# Supplementary material for: Negr1 Deficiency Alters Glutamate Signalling and Kynurenine Pathway in a Mouse Model of Psychiatric Disorders
Source: Research Square preprint supplement (doi:10.21203/rs.3.rs-7023014/v1), 2025-07-04
Supplement: Supplementary file 1 [file 89bf49621e0aa0611edddcb5.docx]

**Supplementary**

***Negr1* Deficiency Alters Glutamate Signalling and Kynurenine Pathway in a Mouse Model of Psychiatric Disorders**

Carolin Kuuskmäe1*, Kaie Mikheim1, Narges Mohammadrahimi1, Kalle Kilk2, Maria Kaare1, Mohan Jayaram1, German Ilnitski1, Este Leidmaa1, Mari-Anne Philips1, Eero Vasar1

1Department of Physiology, Institute of Biomedicine and Translational Medicine, University of Tartu, Tartu, Estonia.

2Department of Biochemistry, Institute of Biomedicine and Translational Medicine, University of Tartu, Tartu, Estonia.

**
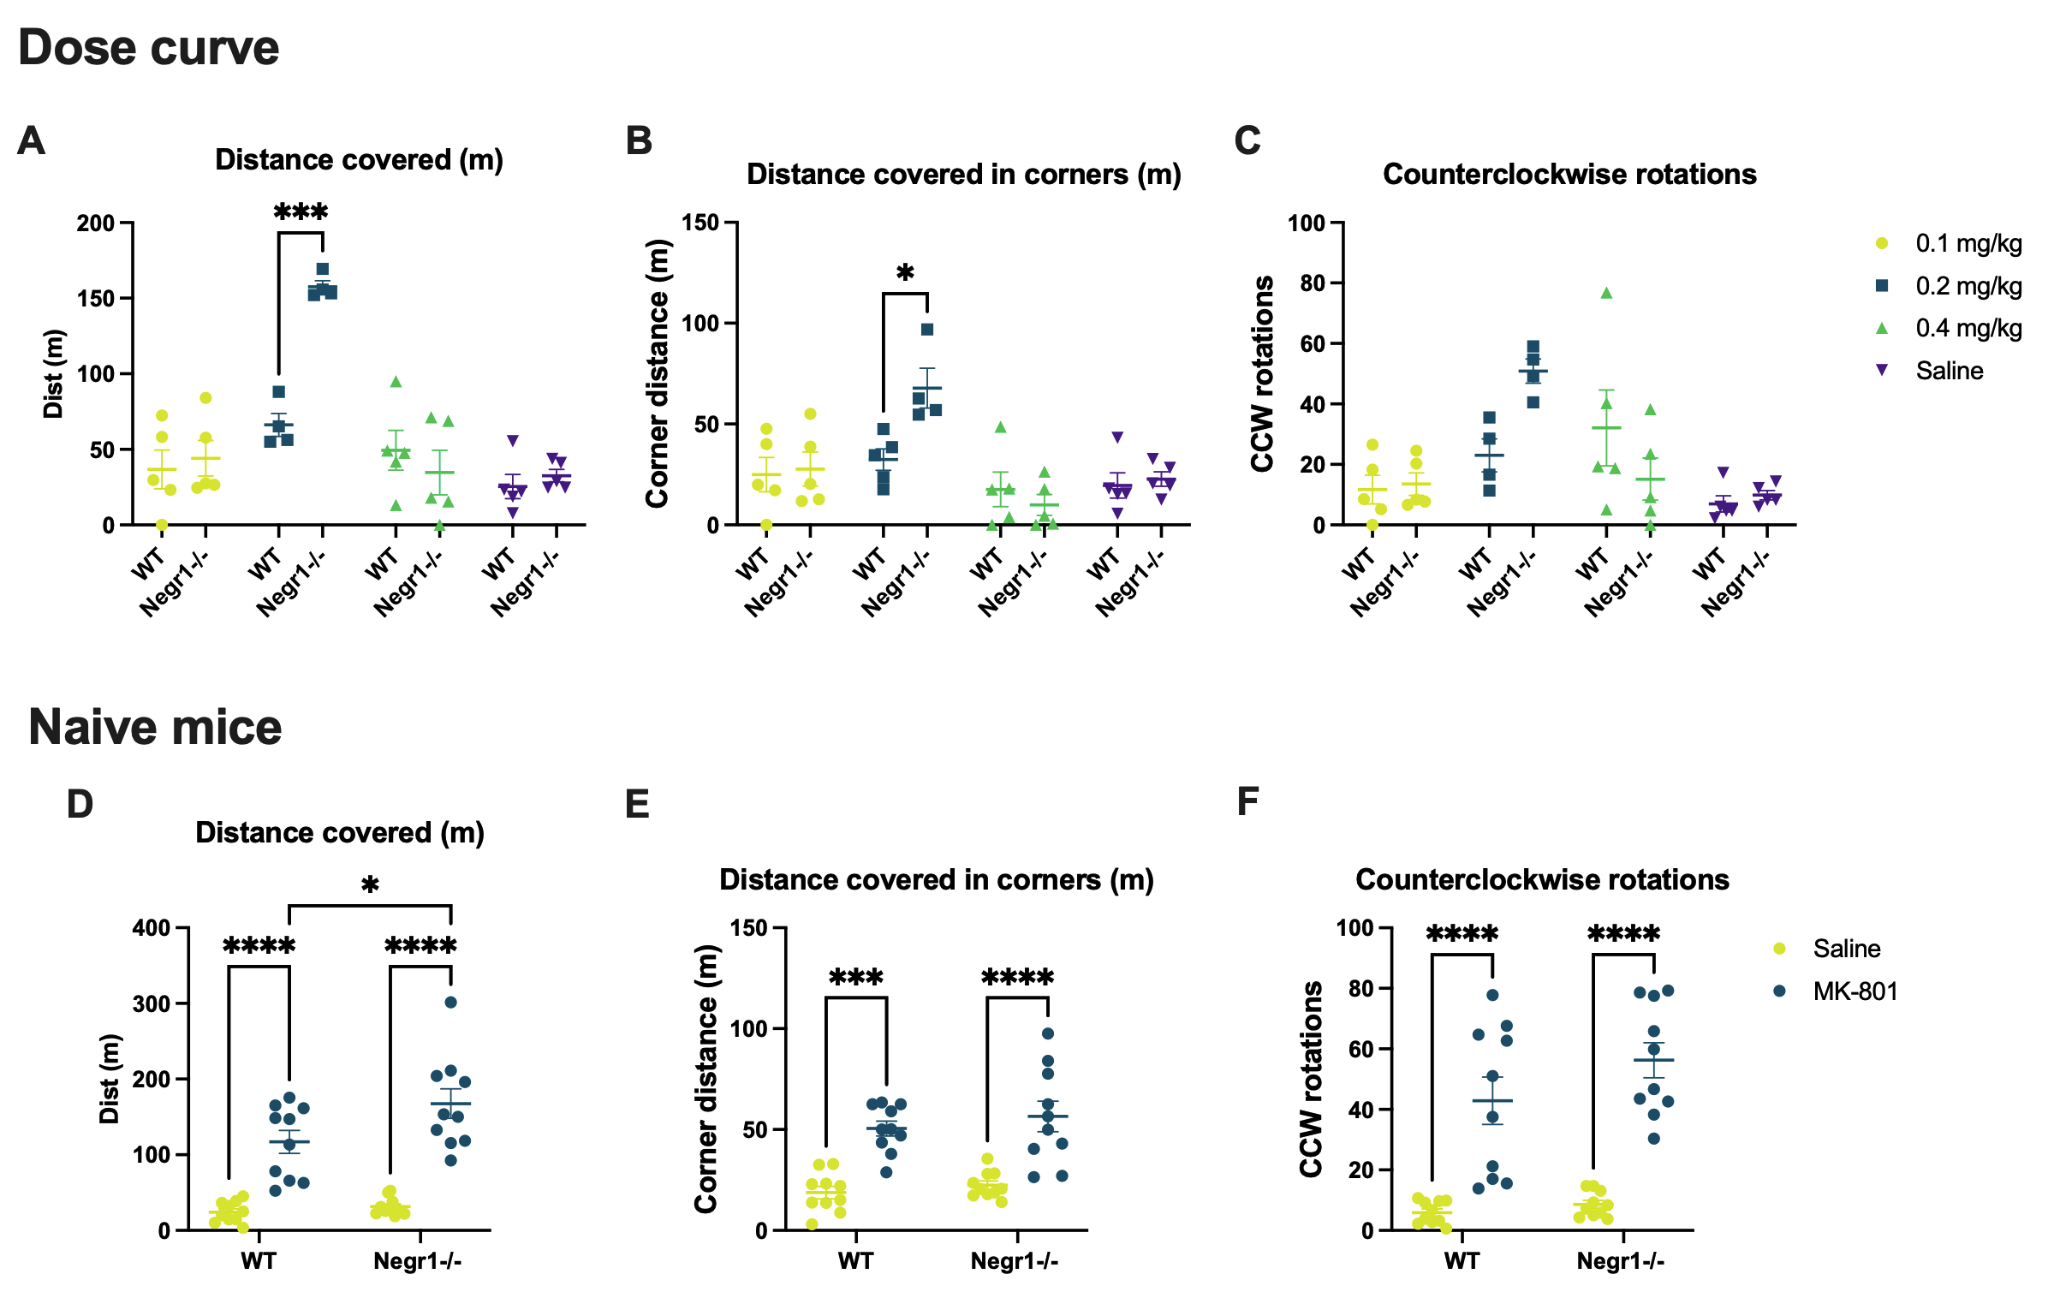
**

**Fig. S1. Dose–response effects of MK-801 (0.1–0.4 mg/kg) in wild-type (WT) and *Negr1*-deficient male mice, and the effect of MK-801 (0.2 mg/kg) in an independent cohort of drug-naive male mice from both genotypes.** The figure shows: (A) total distance covered, (B) distance covered in corners, and (C) number of counterclockwise rotations (n = 4–5 per group). Data are presented as mean ± SEM. Statistical analysis was performed using ordinary two-way ANOVA followed by Tukey's HSD test. *p < 0.05, ***p < 0.0001.

Based on these results, 0.2 mg/kg was selected as the most appropriate dose. (Note: Data for clockwise rotations were not usable; therefore, total rotation counts could not be calculated.)

(D) In a repeated MK-801 administration paradigm, *Negr1*-deficient male mice exhibited a blunted behavioural response over time. Because the mice in the repeated administration group had previously received a single MK-801 dose during the dose–response test (7 days prior), they were not fully drug-naive. We hypothesised that the heightened acute response to MK-801 is specific to drug-naive *Negr1*-deficient mice.

To test this, the acute administration experiment was repeated in an independent cohort of drug-naive male mice (n = 8–10, age 2.5 months). Supporting our hypothesis, *Negr1*-deficient mice in this new cohort again displayed an enhanced motor response, as indicated by increased total distance covered (p < 0.05).

**
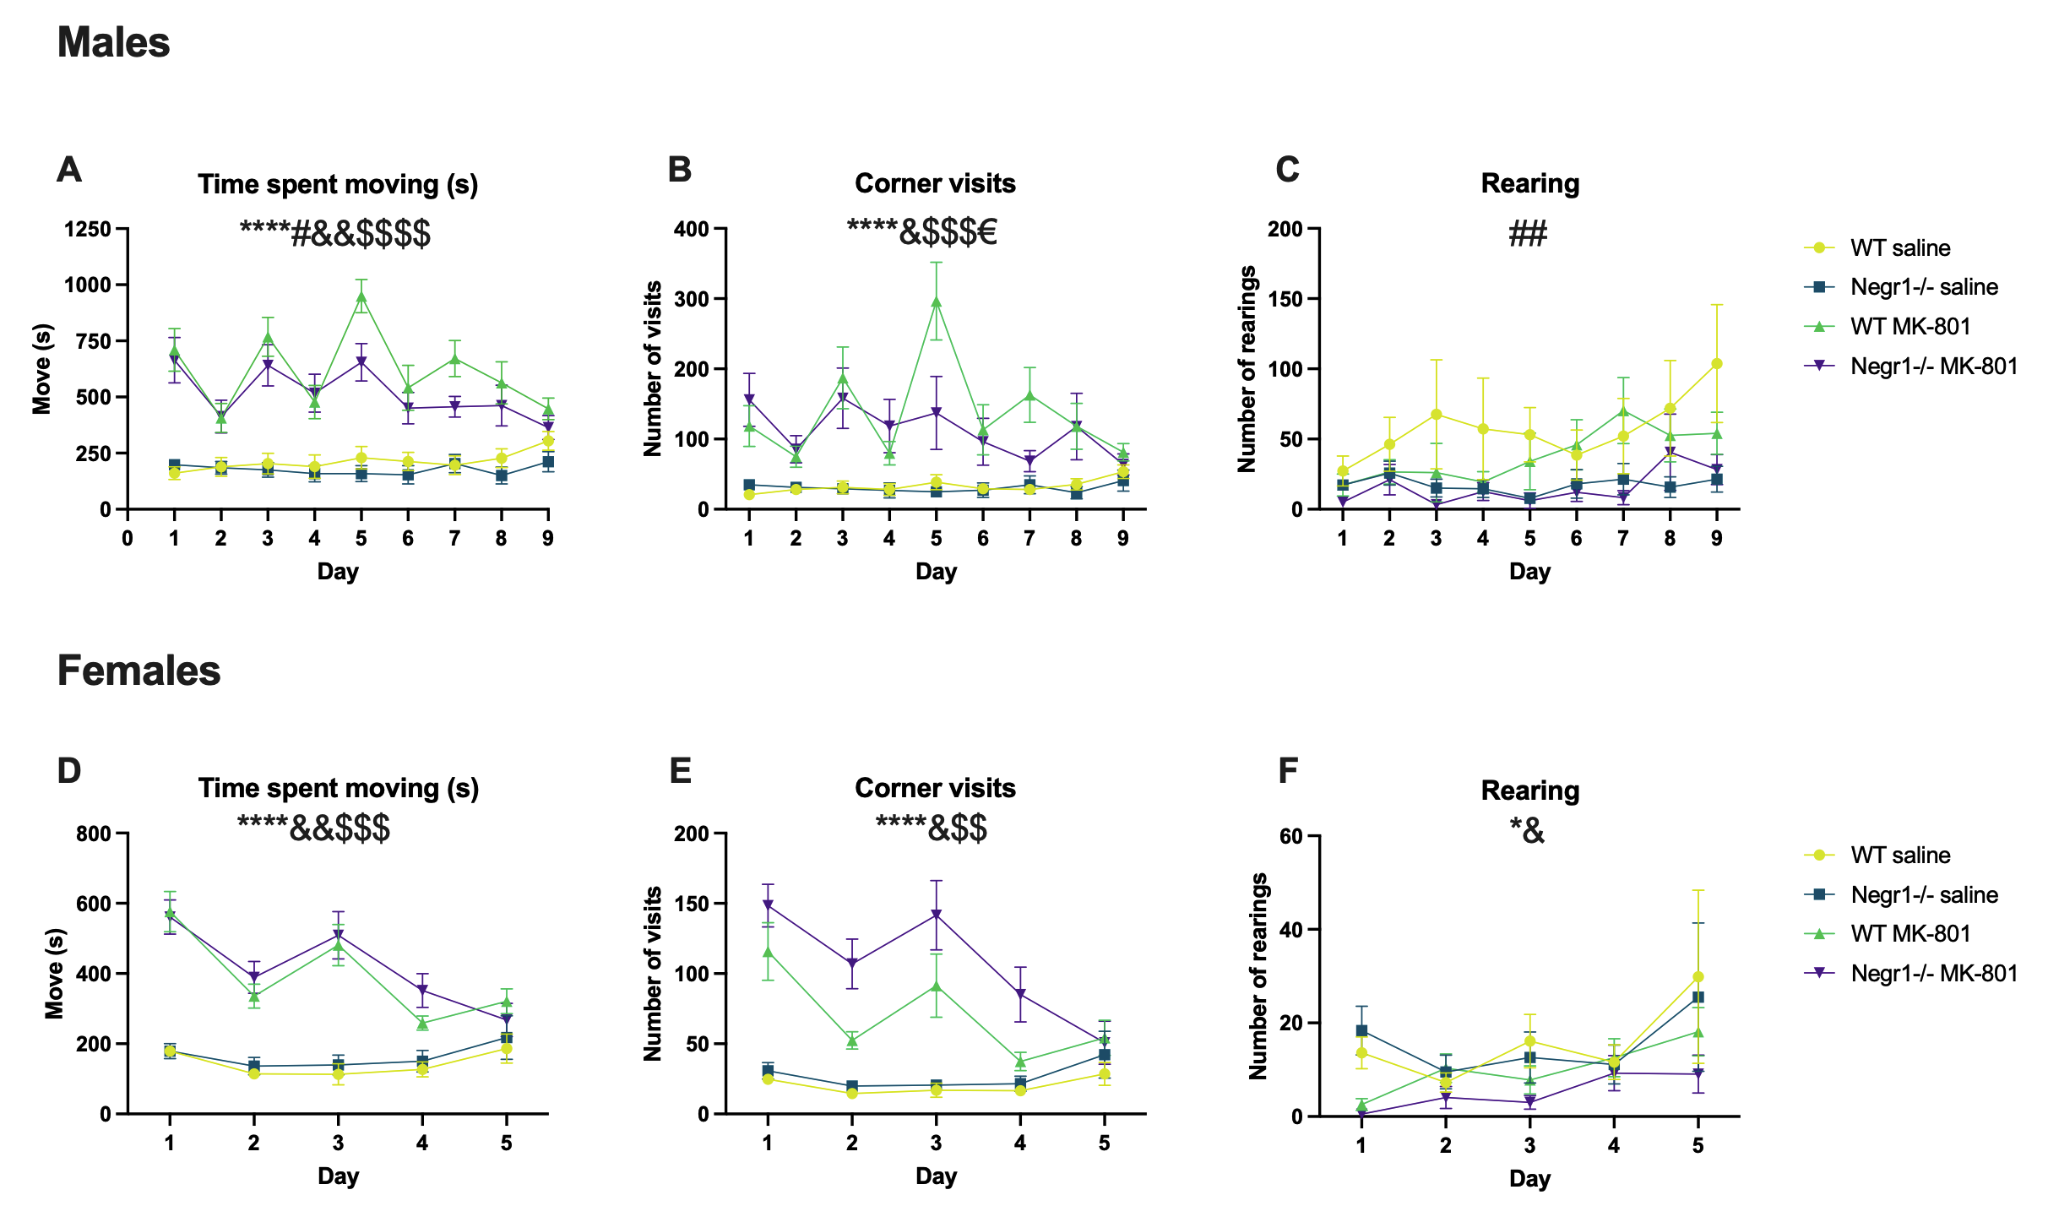
**

**Fig. S2. Effects of MK-801 on the behaviour of wild-type (WT) and *Negr1*-deficient mice.** The figure shows: (A, D) time spent moving, (B, E) number of corner visits, and (C, F) number of rearings in both male and female mice. Each dot represents the daily average per animal (males: n = 10; females: n = 8–16). Error bars indicate SEM. Main effects were analysed using three-way ANOVA followed by Tukey’s HSD test. Statistical significance is indicated by symbols above the graphs: * - treatment, # - genotype, & - day, $ - day and treatment interaction, € - genotype and treatment interaction. One symbol - p < 0.05, two symbols - p < 0.01, three symbols - p < 0.001, four symbols p < 0.0001.

**Effect of repeated treatment with MK-801 (0.2 mg/kg) on locomotor activity in male wild-type and *Negr1*-deficient mice (Fig. S1)**

**Day 1:** MK-801 significantly increased locomotor activity in both wild-type (WT) and *Negr1*-/- mice versus saline controls. Time spent moving was elevated in both genotypes (WT: *p* < 0.0001; *Negr1*-/-: *p* < 0.001), as were corner visits (WT: *p* < 0.05; *Negr1*-/-: *p* < 0.01). No significant changes were observed in the number of rearings.

**Day 2:** A reduced locomotor response was observed following the second MK-801 administration. Nonetheless, time spent moving remained elevated in both WT and *Negr1*-/- mice (*p* < 0.05). Increased corner visits were observed only in *Negr1*-/- mice (*p* < 0.05). The number of rearings remained unchanged.

**Day 3:** MK-801 again induced strong stimulation, particularly in WT mice. Time spent moving increased significantly (WT: *p* < 0.00001; *Negr1*-/-: *p* < 0.001), as did corner visits (WT: *p* < 0.01; *Negr1*-/-: *p* < 0.05).

**Day 4:** Stimulatory effects began to decline. Time spent moving was modestly elevated (WT: *p* < 0.05; *Negr1*-/-: *p* < 0.01), with increased corner observed only in *Negr1-/-* mice (*p* < 0.05). Rearings continued to show no significant differences.

**Day 5:** WT mice exhibited peak locomotor activity (time spent moving: *p* < 1×10⁻⁷; corner visits: *p* < 0.001), while *Negr1-/-* mice showed no further increase or even reductions in activity, resulting in significant genotype differences in both time spent moving and corner visits (*p* < 0.05). Rearings remained unaffected.

**Day 6:** MK-801 effects diminished further. WT mice showed reduced locomotor activity and fewer corner entries; *Negr1-/-* mice exhibited an additional decline, furthering Day 2 levels.

**Days 7–9:** Continued MK-801 administration led to a progressive attenuation of locomotor effects. By Day 9, activity levels had significantly declined in both genotypes compared to Days 3 and 5. In contrast, rearing behaviour appeared to increase slightly but did not reach statistical significance.

**Effect of Repeated Treatment with MK-801 (0.2 mg/kg) on Locomotor Activity in Female Wild-Type and *Negr1*-Deficient Mice (Fig. S1)**

**Day 1**: Similar to males, MK-801 significantly increased locomotor activity in both wild-type (WT) and *Negr1-/-* females (*p* < 0.001) along with elevated corner visits (WT: *p* < 0.05; *Negr1-/-*: *p* < 0.01). In contrast to males, rearings also increased significantly (WT: *p* < 0.05; *Negr1-/-*: *p* < 0.0001).

**Day 2**: A reduced response was observed, although time spent moving remained elevated in both genotypes (*p* < 0.05). Increased corner visits were noted only in *Negr1-/-* mice (*p* < 0.01). Rearings showed no significant change.

**Day 3**: Unlike in males, MK-801 did not fully restore the initial stimulatory effect in females. Locomotion remained modestly elevated (WT and *Negr1-/-*: *p* < 0.05), but only *Negr1-/-* mice showed increased corner visits (*p* < 0.05). The number of rearings remained unchanged.

**Days 4 and 5**: Both locomotion and corner visits declined to near saline-treated control levels, with a marked reduction compared to Day 1. Rearings showed a slight, non-significant increase. The diminishing behavioural response indicated the development of tolerance to MK-801, leading to termination of treatment in females after Day 5.

**Gender Differences in Response to MK-801**

By Day 5, clear sex-dependent differences in behavioural responses emerged, prompting direct comparisons with Day 1.

**Time spent in locomotion:** On Day 5, wild-type males showed increased locomotion compared to Day 1 (*p* < 0.05), unlike *Negr1-/-* males. WT males also displayed greater activity than *Negr1-/-* males (*p* < 0.05). In contrast, both WT and *Negr1-/-* females showed significant reduction in locomotion compared to Day 1 (WT: *p* < 0.01; *Negr1-/-:* *p* < 0.0001), and their activity levels were significantly lower than those of their male counterparts (WT: *p* < 1×10⁻⁵; *Negr1-/-*: *p* < 0.01).

**Corner visits:** WT males exhibited increased corner visits on Day 5 (*p* < 0.05), while *Negr1-/-* males showed no change. Among females, *Negr1-/-* mice showed a significant reduction in corner visits (*p* < 0.001), and WT females showed a milder reduction (*p* < 0.05). On Day 5, WT female mice responded less than WT males (*p* < 0.01), while no sex difference was observed in the *Negr1-/-*group.

**Rearings:** *Negr1-/-* males treated with saline had fewer rearings on Day 5 compared to Day 1 (*p* < 0.01); other male groups showed no significant changes. Among females, WT mice treated with MK-801 exhibited increased rearings (*p* < 0.01). No other significant effects on rearing behaviour were observed.


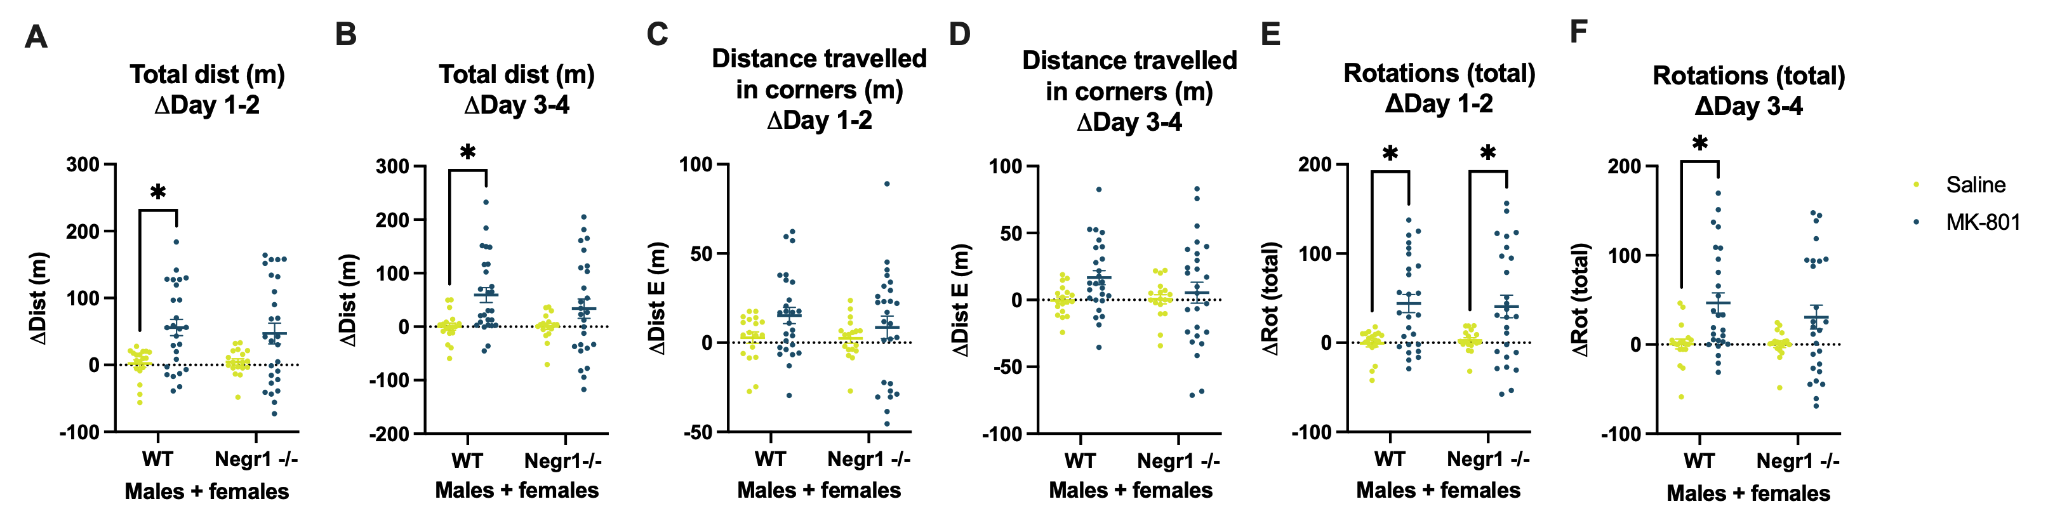


**Fig. S3. Blunted progression of rapid behavioural tolerance during every-other-day MK-801 administration in *Negr1*-deficient mice.** MK-801-induced locomotor activity and stereotypic behaviour progressively declined on alternating days during chronic treatment in both male and female mice. Delta values for Days 1–2 (A, C, E) and Days 3–4 (B, D, F) represent changes in activity between each pair of treatment days. Compared to wild-type (WT) controls, *Negr1-/-* mice showed smaller reductions in behavioural responses, indicating a blunted progression of rapid behavioural tolerance. These genotype-dependent differences suggest altered NMDA receptor sensitivity in *Negr1-/-* mice.

**Table S1. Three-way ANOVA results for MK-801 effect on wild-type (WT) and *Negr1*-deficient mice’s behaviour.**

| Total distance covered (m) - males | ANOVA table | DF | F (DFn, DFd) | P value |
| --- | --- | --- | --- | --- |
|  | Day | 8 | F (2.694, 96.99) = 5.835 | P=0.0016 |
|  | **Treatment** | **1** | **F (1, 36) = 138.4** | **P<0.0001** |
|  | Genotype | 1 | F (1, 36) = 5.023 | P=0.0313 |
|  | **Day x Treatment** | **8** | **F (8, 288) = 7.000** | **P<0.0001** |
|  | Day x Genotype | 8 | F (8, 288) = 1.530 | P=0.1462 |
|  | Treatment  x Genotype | 1 | F (1, 36) = 2.234 | P=0.1437 |
|  | Day x Treatment  x Genotype | 8 | F (8, 288) = 1.180 | P=0.3106 |
| Total distance covered (m) - females | Day | 4 | F (1.796, 79.04) = 6.528 | P=0.0033 |
|  | **Treatment** | **1** | **F (1, 44) = 46.94** | **P<0.0001** |
|  | Genotype | 1 | F (1, 44) = 0.5909 | P=0.4462 |
|  | **Day x Treatment** | **4** | **F (4, 176) = 7.053** | **P<0.0001** |
|  | Day x Genotype | 4 | F (4, 176) = 0.2328 | P=0.9196 |
|  | Treatment  x Genotype | 1 | F (1, 44) = 0.08840 | P=0.7676 |
|  | Day x Treatment  x Genotype | 4 | F (4, 176) = 0.3140 | P=0.8684 |
| Distance covered in corners (m) - males | Day | 8 | F (2.465, 88.73) = 1.069 | P=0.3579 |
|  | **Treatment** | **1** | **F (1, 36) = 106.9** | **P<0.0001** |
|  | Genotype | 1 | F (1, 36) = 4.963 | P=0.0322 |
|  | Day x Treatment | 8 | F (8, 288) = 1.798 | P=0.0772 |
|  | Day  x Genotype | 8 | F (8, 288) = 0.8253 | P=0.5808 |
|  | Treatment  x Genotype | 1 | F (1, 36) = 4.178 | P=0.0483 |
|  | Day x Treatment  x Genotype | 8 | F (8, 288) = 1.122 | P=0.3485 |
| Distance covered in corners (m) - females | Day | 4 | F (2.452, 107.9) = 3.776 | P=0.0187 |
|  | **Treatment** | **1** | **F (1, 44) = 54.54** | **P<0.0001** |
|  | Genotype | 1 | F (1, 44) = 0.02133 | P=0.8845 |
|  | Day x Treatment | 4 | F (4, 176) = 3.662 | P=0.0068 |
|  | Day x Genotype | 4 | F (4, 176) = 0.6053 | P=0.6594 |
|  | Treatment  x Genotype | 1 | F (1, 44) = 0.06169 | P=0.8050 |
|  | Day x Treatment  x Genotype | 4 | F (4, 176) = 0.5096 | P=0.7288 |
| Total rotations made - males | **Day** | **8** | **F (3.102, 111.7) = 8.656** | **P<0.0001** |
|  | **Treatment** | **1** | **F (1, 36) = 146.8** | **P<0.0001** |
|  | Genotype | 1 | F (1, 36) = 4.594 | P=0.0389 |
|  | **Day x Treatment** | **8** | **F (8, 288) = 9.988** | **P<0.0001** |
|  | Day x Genotype | 8 | F (8, 288) = 1.205 | P=0.2955 |
|  | Treatment  x Genotype | 1 | F (1, 36) = 0.6735 | P=0.4172 |
|  | Day x Treatment  x Genotype | 8 | F (8, 288) = 0.8226 | P=0.5832 |
| Total rotations made - females | Day | 4 | F (1.989, 87.52) = 6.128 | P=0.0033 |
|  | **Treatment** | **1** | **F (1, 44) = 38.75** | **P<0.0001** |
|  | Genotype | 1 | F (1, 44) = 0.9073 | P=0.3460 |
|  | **Day x Treatment** | **4** | **F (4, 176) = 6.800** | **P<0.0001** |
|  | Day x Genotype | 4 | F (4, 176) = 0.1165 | P=0.9765 |
|  | Treatment  x Genotype | 1 | F (1, 44) = 0.2287 | P=0.6349 |
|  | Day x Treatment  x Genotype | 4 | F (4, 176) = 0.2100 | P=0.9326 |
| Time spent moving - males | Day | 8 | F (2.197, 79.09) = 4.840 | P=0.0085 |
|  | **Treatment** | **1** | **F (1, 36) = 165.5** | **P<0.0001** |
|  | Genotype | 1 | F (1, 36) = 5.680 | P=0.0226 |
|  | **Day x Treatment** | **8** | **F (8, 288) = 6.114** | **P<0.0001** |
|  | Day x Genotype | 8 | F (8, 288) = 1.026 | P=0.4162 |
|  | Treatment  x Genotype | 1 | F (1, 36) = 1.310 | P=0.2600 |
|  | Day x Treatment  x Genotype | 8 | F (8, 288) = 0.7307 | P=0.6643 |
| Time spent moving - females | Day | 4 | F (2.003, 88.15) = 5.935 | P=0.0038 |
|  | **Treatment** | **1** | **F (1, 44) = 43.82** | **P<0.0001** |
|  | Genotype | 1 | F (1, 44) = 0.2711 | P=0.6052 |
|  | **Day x Treatment** | **4** | **F (4, 176) = 5.963** | **P=0.0002** |
|  | Day x Genotype | 4 | F (4, 176) = 0.2666 | P=0.8991 |
|  | Treatment  x Genotype | 1 | F (1, 44) = 0.001680 | P=0.9675 |
|  | Day x Treatment  x Genotype | 4 | F (4, 176) = 0.2989 | P=0.8784 |
| Corner visits - males | Day | 8 | F (3.360, 121.0) = 3.456 | P=0.0150 |
|  | **Treatment** | **1** | **F (1, 36) = 59.92** | **P<0.0001** |
|  | Genotype | 1 | F (1, 36) = 1.351 | P=0.2528 |
|  | **Day x Treatment** | **8** | **F (8, 288) = 4.028** | **P=0.0001** |
|  | Day x Genotype | 8 | F (8, 288) = 2.036 | P=0.0423 |
|  | Treatment  x Genotype | 1 | F (1, 36) = 0.9624 | P=0.3331 |
|  | Day x Treatment  x Genotype | 8 | F (8, 288) = 1.623 | P=0.1178 |
| Corner visits - females | Day | 4 | F (1.840, 80.97) = 3.451 | P=0.0401 |
|  | **Treatment** | **1** | **F (1, 44) = 24.53** | **P<0.0001** |
|  | Genotype | 1 | F (1, 44) = 2.020 | P=0.1623 |
|  | Day x Treatment | 4 | F (4, 176) = 4.059 | P=0.0036 |
|  | Day x Genotype | 4 | F (4, 176) = 0.2445 | P=0.9127 |
|  | Treatment  x Genotype | 1 | F (1, 44) = 0.8043 | P=0.3747 |
|  | Day x Treatment  x Genotype | 4 | F (4, 176) = 0.4590 | P=0.7658 |
| Rearing - males | Day | 8 | F (1.918, 69.05) = 1.786 | P=0.1767 |
|  | Treatment | 1 | F (1, 36) = 1.234 | P=0.2739 |
|  | Genotype | 1 | F (1, 36) = 10.92 | P=0.0022 |
|  | Day x Treatment | 8 | F (8, 288) = 0.4400 | P=0.8964 |
|  | Day x Genotype | 8 | F (8, 288) = 0.7590 | P=0.6393 |
|  | Treatment  x Genotype | 1 | F (1, 36) = 0.7762 | P=0.3841 |
|  | Day x Treatment  x Genotype | 8 | F (8, 288) = 0.7576 | P=0.6405 |
| Rearing - females | Day | 4 | F (2.015, 88.68) = 4.329 | P=0.0158 |
|  | Treatment | 1 | F (1, 44) = 4.616 | P=0.0372 |
|  | Genotype | 1 | F (1, 44) = 0.4215 | P=0.5196 |
|  | Day x Treatment | 4 | F (4, 176) = 1.966 | P=0.1017 |
|  | Day x Genotype | 4 | F (4, 176) = 0.4282 | P=0.7882 |
|  | Treatment  x Genotype | 1 | F (1, 44) = 0.3252 | P=0.5714 |
|  | Day x Treatment  x Genotype | 4 | F (4, 176) = 0.1625 | P=0.9570 |


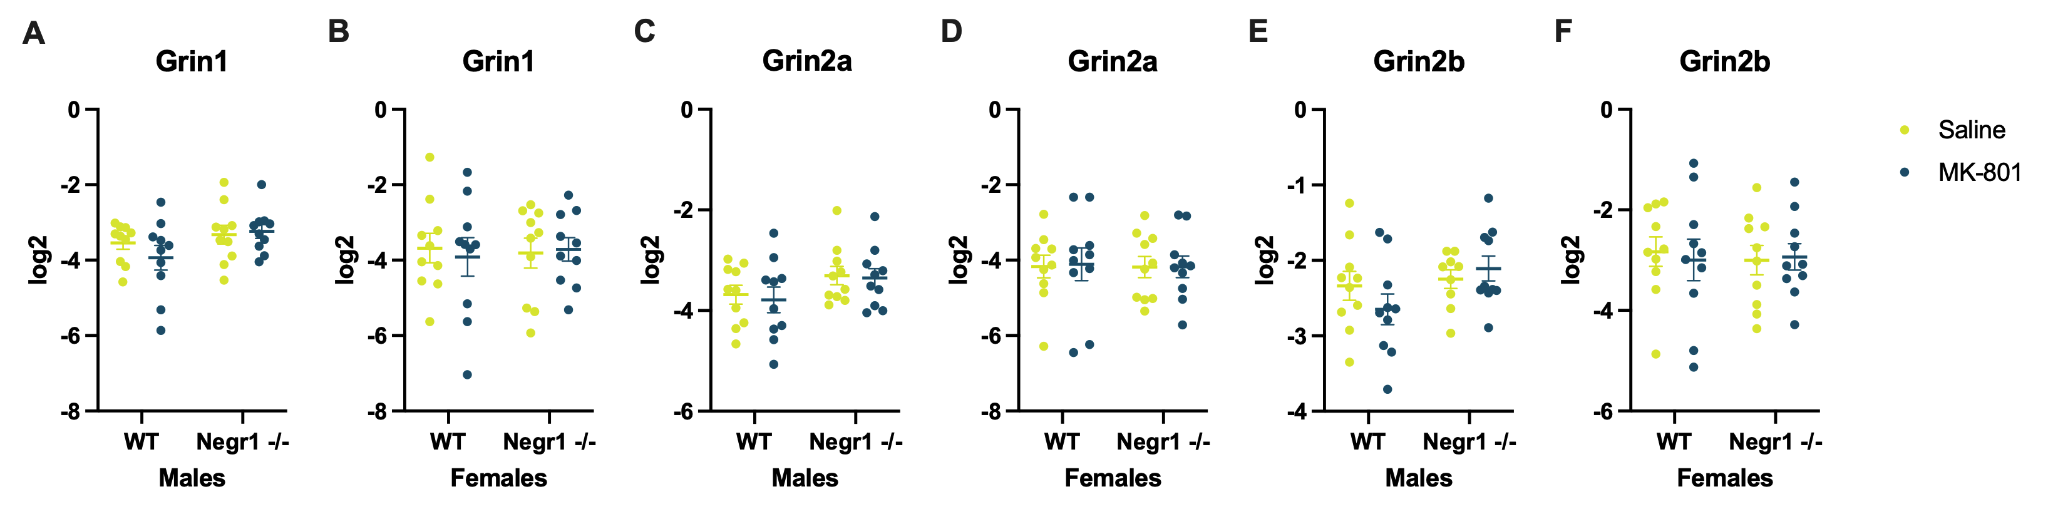


**Fig. S4. NMDA receptor-related gene expression in the ventral striatum of mice.** The figure shows gene expression of *Grin1* (A, B), *Grin2a* (C, D), *Grin2b* (E, F) in both male and female mice. Each graph includes four groups: WT mice injected with physiological solution (saline), WT mice injected with MK-801, *Negr1*-deficient mice injected with physiological solution, *Negr1*-deficient mice injected with MK-801. No statistically significant differences were found between the four groups. However, a significant sex difference was found in the expression of *Grin2a* (F1,72 = 10.40, p < 0.01), *Grin2b* (F1,72 = 11.99, p < 0.001). Each group included *n* = 8–10 mice. Data are presented as mean ± SEM. Statistical analysis was conducted using ordinary two-way ANOVA followed by Tukey’s HSD test. WT – wild-type.


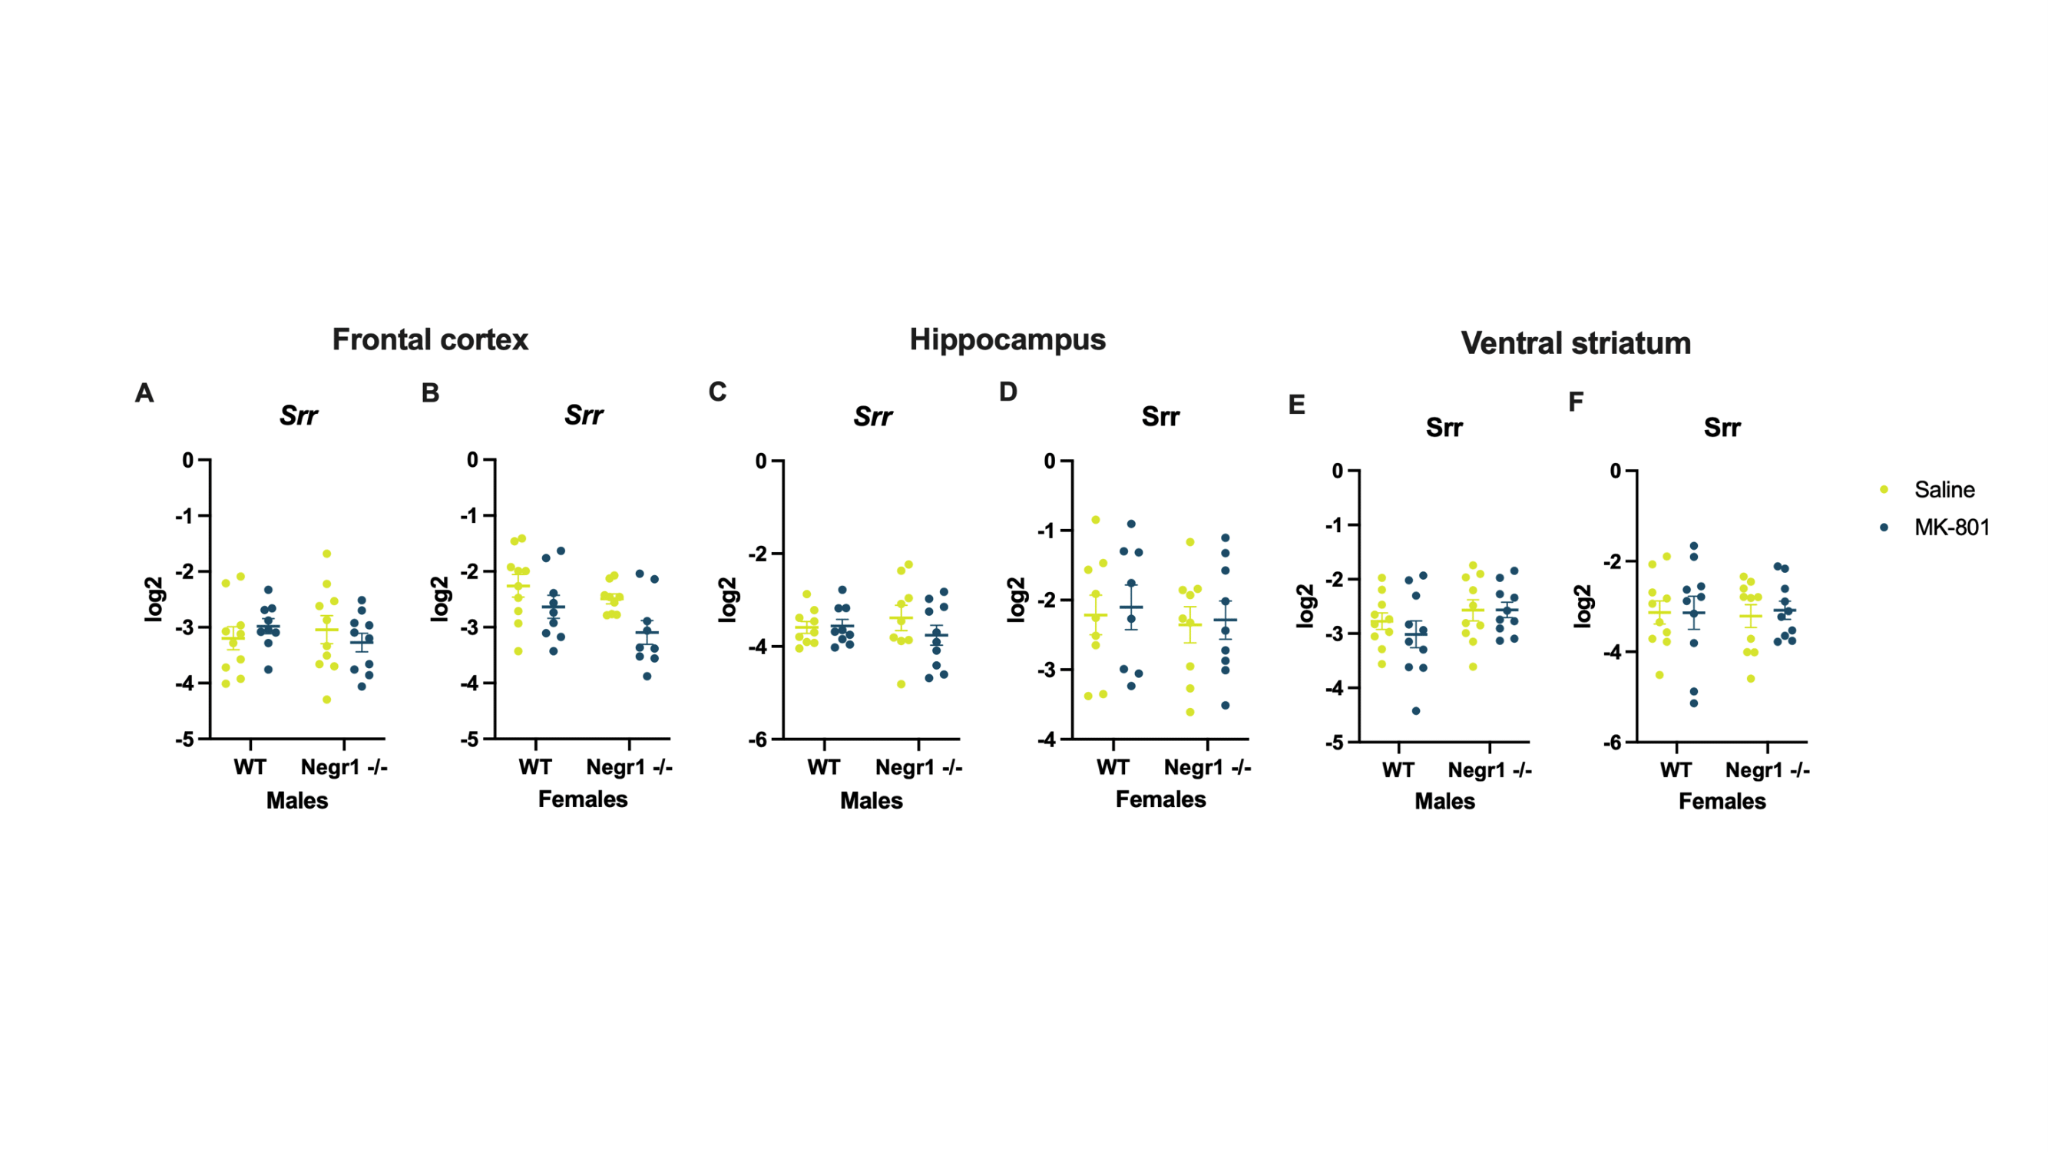


**Fig. S5. *Srr* expression in different regions of the mouse brain.** The figure shows *Srr* gene expression in both male and female mice across three brain regions: frontal cortex (A, B), hippocampus (C, D), and ventral striatum (E, F). Each graph includes four groups: wild-type (WT) mice injected with saline, WT mice injected with MK-801, *Negr1*-deficient mice injected with saline, and *Negr1*-deficient mice injected with MK-801. No statistically significant differences were observed between the four groups in any of the brain regions. Each group included *n* = 8–10 mice. Data are presented as mean ± SEM. Statistical analysis was performed using ordinary two-way ANOVA followed by Tukey’s HSD test.

**
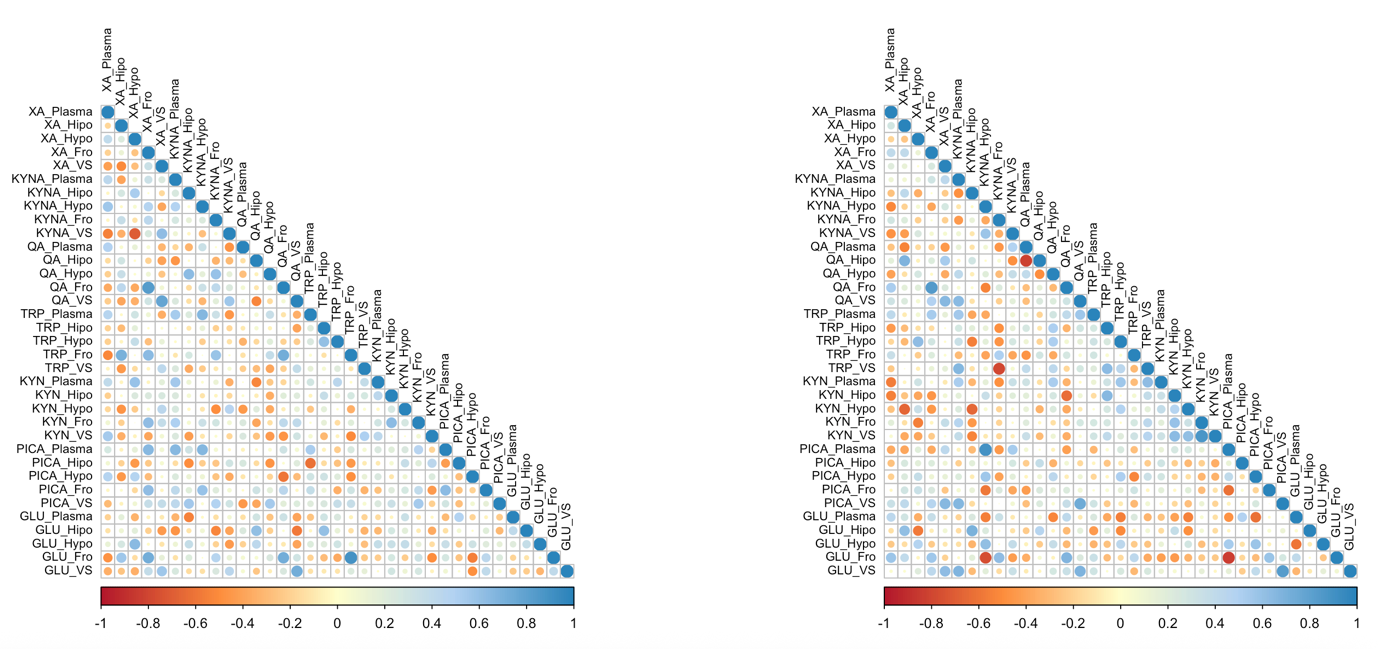
**

**Fig. S6. Correlations among kynurenine pathway metabolites, tryptophan, and glutamate in male mice.** Data are shown for five regions: frontal cortex (Fro), hippocampus (Hipo), hypothalamus (Hypo), ventral striatum (VS), and blood plasma (Plasma). Seven metabolites relevant to the study were included in the correlation analysis: KYNA – kynurenic acid, KYN – kynurenine, TRP – tryptophan, QA – quinolinic acid, PICA – picolinic acid, XA – xanthurenic acid, and GLU – glutamate. Correlation matrices are presented for wild-type mice (left) and *Negr1-/-* mice (right).

**
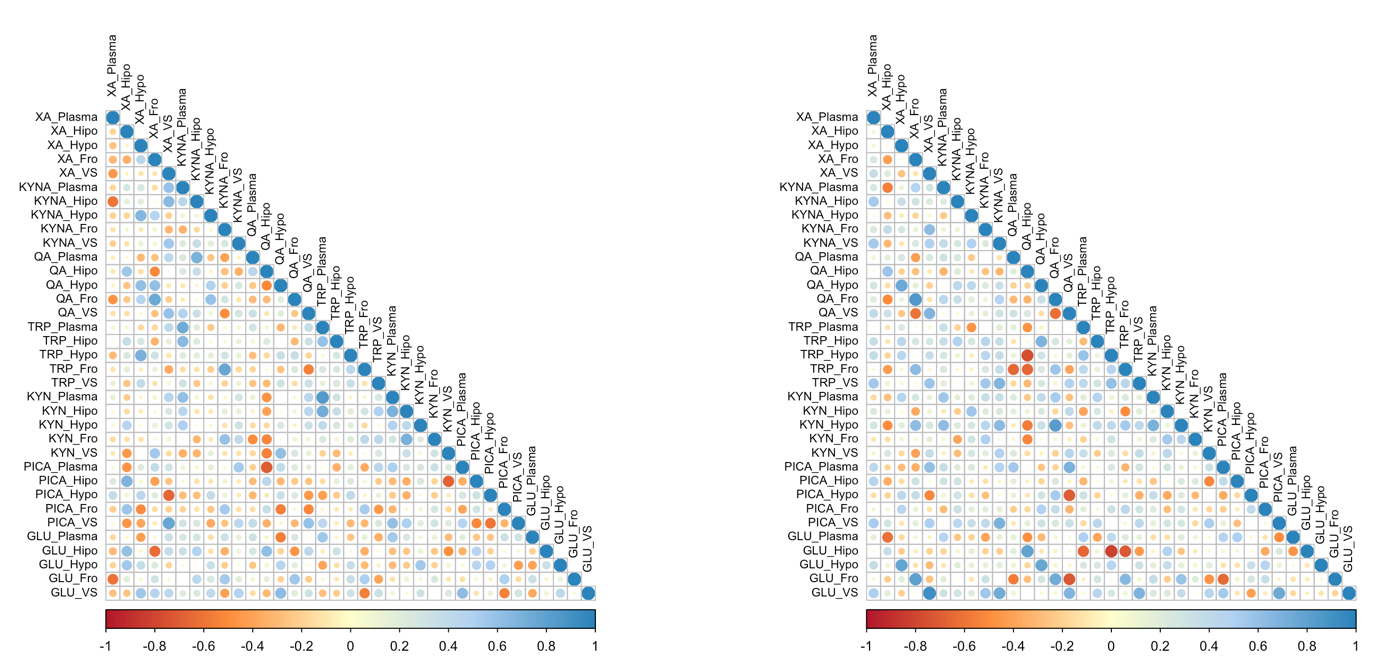
**

**Fig. S7. Correlations among kynurenine pathway metabolites, tryptophan, and glutamate in female mice.** Data are shown for five regions: frontal cortex (Fro), hippocampus (Hipo), hypothalamus (Hypo), ventral striatum (VS), and blood plasma (Plasma). Seven metabolites most relevant to the study were included in the correlation analysis: KYNA – kynurenic acid, KYN – kynurenine, TRP – tryptophan, QA – quinolinic acid, PICA – picolinic acid, XA – xanthurenic acid, and GLU – glutamate.Correlation matrices are presented for wild-type mice (left) and *Negr1-/-* mice (right).

**Table S2. Significant correlations among kynurenine pathway metabolites, tryptophan, and glutamate in male wild-type (WT) mice.** Correlation data are presented for five regions: frontal cortex (Fro), hippocampus (Hipo), hypothalamus (Hypo), ventral striatum (VS), and blood plasma (Plasma). Seven metabolites most relevant to the study were included in the analysis: KYNA – kynurenic acid, KYN – kynurenine, TRP – tryptophan, QA – quinolinic acid, PICA – picolinic acid, XA – xanthurenic acid, and GLU – glutamate.

| **Variable_1** | **Variable_2** | **Correlation** | **P_Value** |
| --- | --- | --- | --- |
| KYNA_Hypo | XA_Plasma | 0.566958 | 0.034496 |
| KYNA_VS | XA_Plasma | -0.54248 | 0.045043 |
| KYN_VS | XA_Plasma | 0.549295 | 0.041897 |
| TRP_Fro | XA_Hipo | 0.701554 | 0.00517 |
| GLU_Fro | XA_Hipo | 0.568364 | 0.033952 |
| KYNA_VS | XA_Hypo | -0.70716 | 0.004677 |
| KYN_Plasma | XA_Hypo | 0.597542 | 0.024031 |
| GLU_Hypo | XA_Hypo | 0.641085 | 0.013485 |
| QA_Fro | XA_Fro | 0.837661 | 0.000184 |
| TRP_Fro | XA_Fro | 0.648712 | 0.012081 |
| KYN_Fro | XA_Fro | 0.626565 | 0.016499 |
| PICA_Plasma | XA_Fro | 0.658443 | 0.010455 |
| **Variable_1** | **Variable_2** | **Correlation** | **P_Value** |
| PICA_Fro | XA_Fro | 0.623856 | 0.017114 |
| GLU_Fro | XA_Fro | 0.723132 | 0.003472 |
| KYNA_VS | XA_VS | 0.628992 | 0.015963 |
| QA_VS | XA_VS | 0.779777 | 0.001006 |
| GLU_VS | XA_VS | 0.566213 | 0.034787 |
| KYN_Plasma | KYNA_Plasma | 0.550631 | 0.0413 |
| PICA_Plasma | KYNA_Plasma | 0.655356 | 0.010951 |
| QA_Hypo | KYNA_Hipo | 0.631185 | 0.015489 |
| PICA_VS | KYNA_Hipo | 0.556023 | 0.038952 |
| GLU_Plasma | KYNA_Hipo | -0.54344 | 0.044588 |
| XA_Plasma | KYNA_Hypo | 0.566958 | 0.034496 |
| TRP_Plasma | KYNA_Hypo | 0.664055 | 0.009598 |
| PICA_Plasma | KYNA_Hypo | 0.663077 | 0.009743 |
| PICA_Fro | KYNA_Hypo | 0.597594 | 0.024016 |
| QA_Hypo | KYNA_Fro | 0.595404 | 0.024673 |
| TRP_Fro | KYNA_Fro | 0.584178 | 0.028259 |
| XA_Plasma | KYNA_VS | -0.54248 | 0.045043 |
| XA_Hypo | KYNA_VS | -0.70716 | 0.004677 |
| XA_VS | KYNA_VS | 0.628992 | 0.015963 |
| QA_VS | KYNA_VS | 0.561633 | 0.036616 |
| GLU_Hipo | QA_Hipo | 0.617638 | 0.018591 |
| KYNA_Hipo | QA_Hypo | 0.631185 | 0.015489 |
| KYNA_Fro | QA_Hypo | 0.595404 | 0.024673 |
| PICA_VS | QA_Hypo | 0.542745 | 0.044917 |
| XA_Fro | QA_Fro | 0.837661 | 0.000184 |
| TRP_Fro | QA_Fro | 0.721911 | 0.003554 |
| PICA_Hypo | QA_Fro | -0.59197 | 0.025733 |
| GLU_Fro | QA_Fro | 0.726629 | 0.003244 |
| XA_VS | QA_VS | 0.779777 | 0.001006 |
| KYNA_VS | QA_VS | 0.561633 | 0.036616 |
| GLU_Hipo | QA_VS | -0.5701 | 0.033288 |
| GLU_VS | QA_VS | 0.724612 | 0.003374 |
| KYNA_Hypo | TRP_Plasma | 0.664055 | 0.009598 |
| PICA_Hipo | TRP_Plasma | -0.61682 | 0.018791 |
| TRP_Hypo | TRP_Hipo | 0.602871 | 0.022485 |
| GLU_Hipo | TRP_Hipo | 0.607966 | 0.021078 |
| TRP_Hipo | TRP_Hypo | 0.602871 | 0.022485 |
| XA_Hipo | TRP_Fro | 0.701554 | 0.00517 |
| XA_Fro | TRP_Fro | 0.648712 | 0.012081 |
| KYNA_Fro | TRP_Fro | 0.584178 | 0.028259 |
| QA_Fro | TRP_Fro | 0.721911 | 0.003554 |
| GLU_Fro | TRP_Fro | 0.893497 | 0.0000167 |
| XA_Hypo | KYN_Plasma | 0.597542 | 0.024031 |
| KYNA_Plasma | KYN_Plasma | 0.550631 | 0.0413 |
| KYN_Fro | KYN_Hipo | 0.630437 | 0.01565 |
| XA_Fro | KYN_Fro | 0.626565 | 0.016499 |
| KYN_Hipo | KYN_Fro | 0.630437 | 0.01565 |
| PICA_VS | KYN_Fro | 0.545619 | 0.043573 |
| XA_Plasma | KYN_VS | 0.549295 | 0.041897 |
| XA_Fro | PICA_Plasma | 0.658443 | 0.010455 |
| KYNA_Plasma | PICA_Plasma | 0.655356 | 0.010951 |
| KYNA_Hypo | PICA_Plasma | 0.663077 | 0.009743 |
| PICA_Fro | PICA_Plasma | 0.637615 | 0.014163 |
| TRP_Plasma | PICA_Hipo | -0.61682 | 0.018791 |
| QA_Fro | PICA_Hypo | -0.59197 | 0.025733 |
| GLU_Fro | PICA_Hypo | -0.55681 | 0.03862 |
| XA_Fro | PICA_Fro | 0.623856 | 0.017114 |
| KYNA_Hypo | PICA_Fro | 0.597594 | 0.024016 |
| PICA_Plasma | PICA_Fro | 0.637615 | 0.014163 |
| KYNA_Hipo | PICA_VS | 0.556023 | 0.038952 |
| QA_Hypo | PICA_VS | 0.542745 | 0.044917 |
| KYN_Fro | PICA_VS | 0.545619 | 0.043573 |
| KYNA_Hipo | GLU_Plasma | -0.54344 | 0.044588 |
| QA_Hipo | GLU_Hipo | 0.617638 | 0.018591 |
| QA_VS | GLU_Hipo | -0.5701 | 0.033288 |
| TRP_Hipo | GLU_Hipo | 0.607966 | 0.021078 |
| XA_Hypo | GLU_Hypo | 0.641085 | 0.013485 |
| XA_Hipo | GLU_Fro | 0.568364 | 0.033952 |
| XA_Fro | GLU_Fro | 0.723132 | 0.003472 |
| QA_Fro | GLU_Fro | 0.726629 | 0.003244 |
| TRP_Fro | GLU_Fro | 0.893497 | 0.0000167 |
| PICA_Hypo | GLU_Fro | -0.55681 | 0.03862 |
| XA_VS | GLU_VS | 0.566213 | 0.034787 |
| QA_VS | GLU_VS | 0.724612 | 0.003374 |
|  |  |  |  |
|  |  |  |  |

**Table S3. Significant correlations among kynurenine pathway metabolites, tryptophan, and glutamate in male *Negr1-/-* mice.** Correlation data are presented for five regions: frontal cortex (Fro), hippocampus (Hipo), hypothalamus (Hypo), ventral striatum (VS), and blood plasma (Plasma). Seven metabolites most relevant to the study were included in the analysis: KYNA – kynurenic acid, KYN – kynurenine, TRP – tryptophan, QA – quinolinic acid, PICA – picolinic acid, XA – xanthurenic acid, and GLU – glutamate.

| **Variable_1** | **Variable_2** | **Correlation** | **P_Value** |
| --- | --- | --- | --- |
| KYN_Plasma | XA_Plasma | -0.56162 | 0.045787 |
| GLU_Fro | XA_Plasma | 0.573069 | 0.04063 |
| QA_Hipo | XA_Hipo | 0.684953 | 0.009785 |
| KYN_Hypo | XA_Hipo | -0.66581 | 0.012985 |
| GLU_Hipo | XA_Hipo | 0.61687 | 0.024719 |
| TRP_Hypo | XA_Hypo | 0.629257 | 0.021206 |
| KYN_Fro | XA_Hypo | -0.55728 | 0.047863 |
| GLU_Hipo | XA_Hypo | -0.57502 | 0.039795 |
| QA_Fro | XA_Fro | 0.841471 | 0.000311 |
| GLU_Fro | XA_Fro | 0.569263 | 0.042296 |
| QA_VS | XA_VS | 0.651838 | 0.015775 |
| PICA_VS | XA_VS | 0.657478 | 0.014599 |
| GLU_VS | XA_VS | 0.624851 | 0.02241 |
| QA_VS | KYNA_Plasma | 0.648407 | 0.016524 |
| TRP_VS | KYNA_Plasma | 0.664163 | 0.013292 |
| PICA_VS | KYNA_Plasma | 0.668468 | 0.012498 |
| GLU_VS | KYNA_Plasma | 0.673262 | 0.011657 |
| KYN_Hypo | KYNA_Hipo | -0.65432 | 0.015248 |
| GLU_Hipo | KYNA_Hipo | 0.69217 | 0.008749 |
| KYNA_VS | KYNA_Hypo | 0.570911 | 0.041569 |
| PICA_Plasma | KYNA_Hypo | 0.896552 | 0.0000332 |
| PICA_Hypo | KYNA_Hypo | 0.569698 | 0.042103 |
| PICA_Fro | KYNA_Hypo | -0.58448 | 0.035922 |
| GLU_Plasma | KYNA_Hypo | -0.5546 | 0.049176 |
| GLU_Hypo | KYNA_Hypo | 0.612295 | 0.026119 |
| GLU_Fro | KYNA_Hypo | -0.76984 | 0.002084 |
| TRP_VS | KYNA_Fro | -0.79494 | 0.001163 |
| GLU_Fro | KYNA_Fro | 0.624224 | 0.022585 |
| KYNA_Hypo | KYNA_VS | 0.570911 | 0.041569 |
| QA_Hipo | QA_Plasma | -0.81836 | 0.000627 |
| XA_Hipo | QA_Hipo | 0.684953 | 0.009785 |
| QA_Plasma | QA_Hipo | -0.81836 | 0.000627 |
| XA_Fro | QA_Fro | 0.841471 | 0.000311 |
| KYN_Hipo | QA_Fro | -0.63968 | 0.018551 |
| **Variable_1** | **Variable_2** | **Correlation** | **P_Value** |
| GLU_Fro | QA_Fro | 0.679601 | 0.010611 |
| XA_VS | QA_VS | 0.651838 | 0.015775 |
| KYNA_Plasma | QA_VS | 0.648407 | 0.016524 |
| TRP_Plasma | QA_VS | 0.56108 | 0.046043 |
| PICA_VS | QA_VS | 0.743177 | 0.003602 |
| GLU_VS | QA_VS | 0.684694 | 0.009824 |
| QA_VS | TRP_Plasma | 0.56108 | 0.046043 |
| TRP_VS | TRP_Hipo | 0.632578 | 0.020331 |
| KYN_Hipo | TRP_Hipo | 0.65742 | 0.014611 |
| XA_Hypo | TRP_Hypo | 0.629257 | 0.021206 |
| KYN_Plasma | TRP_Hypo | 0.569741 | 0.042084 |
| KYNA_Plasma | TRP_VS | 0.664163 | 0.013292 |
| KYNA_Fro | TRP_VS | -0.79494 | 0.001163 |
| TRP_Hipo | TRP_VS | 0.632578 | 0.020331 |
| KYN_Plasma | TRP_VS | 0.621527 | 0.023351 |
| XA_Plasma | KYN_Plasma | -0.56162 | 0.045787 |
| TRP_Hypo | KYN_Plasma | 0.569741 | 0.042084 |
| TRP_VS | KYN_Plasma | 0.621527 | 0.023351 |
| QA_Fro | KYN_Hipo | -0.63968 | 0.018551 |
| TRP_Hipo | KYN_Hipo | 0.65742 | 0.014611 |
| KYN_Fro | KYN_Hipo | 0.594963 | 0.031957 |
| KYN_VS | KYN_Hipo | 0.636276 | 0.019389 |
| XA_Hipo | KYN_Hypo | -0.66581 | 0.012985 |
| KYNA_Hipo | KYN_Hypo | -0.65432 | 0.015248 |
| KYN_VS | KYN_Hypo | 0.61585 | 0.025026 |
| XA_Hypo | KYN_Fro | -0.55728 | 0.047863 |
| KYN_Hipo | KYN_Fro | 0.594963 | 0.031957 |
| KYN_VS | KYN_Fro | 0.879846 | 0.0000731 |
| KYN_Hipo | KYN_VS | 0.636276 | 0.019389 |
| KYN_Hypo | KYN_VS | 0.61585 | 0.025026 |
| KYN_Fro | KYN_VS | 0.879846 | 0.0000731 |
| KYNA_Hypo | PICA_Plasma | 0.896552 | 0.0000332 |
| PICA_Fro | PICA_Plasma | -0.61065 | 0.026638 |
| GLU_Fro | PICA_Plasma | -0.83904 | 0.000336 |
| KYNA_Hypo | PICA_Hypo | 0.569698 | 0.042103 |
| GLU_Plasma | PICA_Hypo | -0.61978 | 0.023858 |
| GLU_Hypo | PICA_Hypo | 0.573868 | 0.040287 |
| KYNA_Hypo | PICA_Fro | -0.58448 | 0.035922 |
| PICA_Plasma | PICA_Fro | -0.61065 | 0.026638 |
| GLU_Fro | PICA_Fro | 0.580901 | 0.037353 |
| XA_VS | PICA_VS | 0.657478 | 0.014599 |
| KYNA_Plasma | PICA_VS | 0.668468 | 0.012498 |
| QA_VS | PICA_VS | 0.743177 | 0.003602 |
| GLU_VS | PICA_VS | 0.832352 | 0.000415 |
| KYNA_Hypo | GLU_Plasma | -0.5546 | 0.049176 |
| PICA_Hypo | GLU_Plasma | -0.61978 | 0.023858 |
| GLU_Hypo | GLU_Plasma | -0.59831 | 0.030763 |
| XA_Hipo | GLU_Hipo | 0.61687 | 0.024719 |
| XA_Hypo | GLU_Hipo | -0.57502 | 0.039795 |
| KYNA_Hipo | GLU_Hipo | 0.69217 | 0.008749 |
| KYNA_Hypo | GLU_Hypo | 0.612295 | 0.026119 |
| PICA_Hypo | GLU_Hypo | 0.573868 | 0.040287 |
| GLU_Plasma | GLU_Hypo | -0.59831 | 0.030763 |
| XA_Plasma | GLU_Fro | 0.573069 | 0.04063 |
| XA_Fro | GLU_Fro | 0.569263 | 0.042296 |
| KYNA_Hypo | GLU_Fro | -0.76984 | 0.002084 |
| KYNA_Fro | GLU_Fro | 0.624224 | 0.022585 |
| QA_Fro | GLU_Fro | 0.679601 | 0.010611 |
| PICA_Plasma | GLU_Fro | -0.83904 | 0.000336 |
| PICA_Fro | GLU_Fro | 0.580901 | 0.037353 |
| XA_VS | GLU_VS | 0.624851 | 0.02241 |
| KYNA_Plasma | GLU_VS | 0.673262 | 0.011657 |
| QA_VS | GLU_VS | 0.684694 | 0.009824 |
| PICA_VS | GLU_VS | 0.832352 | 0.000415 |
|  |  |  |  |
|  |  |  |  |
|  |  |  |  |

**Table S4. Significant correlations among kynurenine pathway metabolites, tryptophan, and glutamate in female wild-type (WT) mice.** Correlation data are presented for five regions: frontal cortex (Fro), hippocampus (Hipo), hypothalamus (Hypo), ventral striatum (VS), and blood plasma (Plasma). Seven metabolites most relevant to the study were included in the analysis: KYNA – kynurenic acid, KYN – kynurenine, TRP – tryptophan, QA – quinolinic acid, PICA – picolinic acid, XA – xanthurenic acid, and GLU – glutamate.

| **Variable_1** | **Variable_2** | **Correlation** | **P_Value** |
| --- | --- | --- | --- |
| KYNA_Hipo | XA_Plasma | -0.59545 | 0.02466 |
| GLU_Fro | XA_Plasma | -0.60368 | 0.022258 |
| QA_Hipo | XA_Hipo | 0.560746 | 0.036979 |
| PICA_Hipo | XA_Hipo | 0.684782 | 0.006891 |
| PICA_Fro | XA_Hipo | 0.577817 | 0.030456 |
| GLU_Hipo | XA_Hipo | 0.602913 | 0.022473 |
| GLU_Hypo | XA_Hipo | 0.550251 | 0.041469 |
| KYNA_Hypo | XA_Hypo | 0.667121 | 0.009153 |
| QA_Hypo | XA_Hypo | 0.613144 | 0.019717 |
| TRP_Hypo | XA_Hypo | 0.705713 | 0.004801 |
| GLU_VS | XA_Hypo | 0.560349 | 0.037142 |
| QA_Hypo | XA_Fro | 0.603659 | 0.022263 |
| QA_Fro | XA_Fro | 0.75355 | 0.001857 |
| KYN_VS | XA_Fro | 0.550192 | 0.041495 |
| GLU_Hipo | XA_Fro | -0.63794 | 0.014098 |
| KYNA_Plasma | XA_VS | 0.59494 | 0.024814 |
| **Variable_1** | **Variable_2** | **Correlation** | **P_Value** |
| KYNA_Hipo | XA_VS | 0.648778 | 0.012069 |
| KYNA_VS | XA_VS | 0.558918 | 0.037734 |
| QA_VS | XA_VS | 0.593734 | 0.025184 |
| PICA_Hypo | XA_VS | -0.66143 | 0.009992 |
| PICA_VS | XA_VS | 0.769368 | 0.001295 |
| XA_VS | KYNA_Plasma | 0.59494 | 0.024814 |
| TRP_Plasma | KYNA_Plasma | 0.73373 | 0.002817 |
| TRP_Hipo | KYNA_Plasma | 0.645006 | 0.012748 |
| KYN_Plasma | KYNA_Plasma | 0.61528 | 0.019176 |
| XA_Plasma | KYNA_Hipo | -0.59545 | 0.02466 |
| XA_VS | KYNA_Hipo | 0.648778 | 0.012069 |
| QA_Plasma | KYNA_Hipo | 0.705316 | 0.004835 |
| XA_Hypo | KYNA_Hypo | 0.667121 | 0.009153 |
| QA_Fro | KYNA_Hypo | 0.593978 | 0.025109 |
| TRP_Fro | KYNA_Fro | 0.768838 | 0.001311 |
| KYN_Fro | KYNA_Fro | 0.597736 | 0.023973 |
| PICA_Fro | KYNA_Fro | 0.546214 | 0.043298 |
| GLU_Fro | KYNA_Fro | 0.546362 | 0.04323 |
| XA_VS | KYNA_VS | 0.558918 | 0.037734 |
| PICA_Plasma | KYNA_VS | 0.549107 | 0.041981 |
| KYNA_Hipo | QA_Plasma | 0.705316 | 0.004835 |
| XA_Hipo | QA_Hipo | 0.560746 | 0.036979 |
| KYN_VS | QA_Hipo | -0.54628 | 0.04327 |
| PICA_Plasma | QA_Hipo | -0.70344 | 0.005 |
| GLU_Hipo | QA_Hipo | 0.613847 | 0.019538 |
| XA_Hypo | QA_Hypo | 0.613144 | 0.019717 |
| XA_Fro | QA_Hypo | 0.603659 | 0.022263 |
| KYN_VS | QA_Hypo | 0.612797 | 0.019806 |
| PICA_Fro | QA_Hypo | -0.55046 | 0.041377 |
| GLU_Plasma | QA_Hypo | -0.55051 | 0.041353 |
| GLU_VS | QA_Hypo | 0.638113 | 0.014064 |
| XA_Fro | QA_Fro | 0.75355 | 0.001857 |
| KYNA_Hypo | QA_Fro | 0.593978 | 0.025109 |
| GLU_Fro | QA_Fro | 0.567442 | 0.034308 |
| XA_VS | QA_VS | 0.593734 | 0.025184 |
| TRP_Fro | QA_VS | -0.54414 | 0.044262 |
| PICA_VS | QA_VS | 0.590942 | 0.026055 |
| KYNA_Plasma | TRP_Plasma | 0.73373 | 0.002817 |
| TRP_Hipo | TRP_Plasma | 0.597261 | 0.024115 |
| KYN_Plasma | TRP_Plasma | 0.841933 | 0.000159 |
| KYN_Hipo | TRP_Plasma | 0.729975 | 0.003037 |
| GLU_Plasma | TRP_Plasma | 0.561707 | 0.036586 |
| KYNA_Plasma | TRP_Hipo | 0.645006 | 0.012748 |
| TRP_Plasma | TRP_Hipo | 0.597261 | 0.024115 |
| XA_Hypo | TRP_Hypo | 0.705713 | 0.004801 |
| KYNA_Fro | TRP_Fro | 0.768838 | 0.001311 |
| QA_VS | TRP_Fro | -0.54414 | 0.044262 |
| GLU_VS | TRP_Fro | -0.55212 | 0.040641 |
| KYNA_Plasma | KYN_Plasma | 0.61528 | 0.019176 |
| TRP_Plasma | KYN_Plasma | 0.841933 | 0.000159 |
| KYN_Hipo | KYN_Plasma | 0.699695 | 0.005342 |
| PICA_VS | KYN_Plasma | 0.600443 | 0.02318 |
| GLU_Plasma | KYN_Plasma | 0.540479 | 0.045998 |
| TRP_Plasma | KYN_Hipo | 0.729975 | 0.003037 |
| KYN_Plasma | KYN_Hipo | 0.699695 | 0.005342 |
| KYN_Fro | KYN_Hipo | 0.708435 | 0.00457 |
| GLU_Hypo | KYN_Hypo | 0.552705 | 0.040385 |
| KYNA_Fro | KYN_Fro | 0.597736 | 0.023973 |
| KYN_Hipo | KYN_Fro | 0.708435 | 0.00457 |
| XA_Fro | KYN_VS | 0.550192 | 0.041495 |
| QA_Hipo | KYN_VS | -0.54628 | 0.04327 |
| QA_Hypo | KYN_VS | 0.612797 | 0.019806 |
| PICA_Hipo | KYN_VS | -0.67797 | 0.007705 |
| KYNA_VS | PICA_Plasma | 0.549107 | 0.041981 |
| QA_Hipo | PICA_Plasma | -0.70344 | 0.005 |
| GLU_VS | PICA_Plasma | 0.62387 | 0.017111 |
| XA_Hipo | PICA_Hipo | 0.684782 | 0.006891 |
| KYN_VS | PICA_Hipo | -0.67797 | 0.007705 |
| XA_VS | PICA_Hypo | -0.66143 | 0.009992 |
| PICA_VS | PICA_Hypo | -0.59397 | 0.025112 |
| XA_Hipo | PICA_Fro | 0.577817 | 0.030456 |
| KYNA_Fro | PICA_Fro | 0.546214 | 0.043298 |
| QA_Hypo | PICA_Fro | -0.55046 | 0.041377 |
| GLU_VS | PICA_Fro | -0.54758 | 0.042674 |
| XA_VS | PICA_VS | 0.769368 | 0.001295 |
| QA_VS | PICA_VS | 0.590942 | 0.026055 |
| KYN_Plasma | PICA_VS | 0.600443 | 0.02318 |
| PICA_Hypo | PICA_VS | -0.59397 | 0.025112 |
| QA_Hypo | GLU_Plasma | -0.55051 | 0.041353 |
| TRP_Plasma | GLU_Plasma | 0.561707 | 0.036586 |
| KYN_Plasma | GLU_Plasma | 0.540479 | 0.045998 |
| XA_Hipo | GLU_Hipo | 0.602913 | 0.022473 |
| XA_Fro | GLU_Hipo | -0.63794 | 0.014098 |
| QA_Hipo | GLU_Hipo | 0.613847 | 0.019538 |
| XA_Hipo | GLU_Hypo | 0.550251 | 0.041469 |
| KYN_Hypo | GLU_Hypo | 0.552705 | 0.040385 |
| XA_Plasma | GLU_Fro | -0.60368 | 0.022258 |
| KYNA_Fro | GLU_Fro | 0.546362 | 0.04323 |
| QA_Fro | GLU_Fro | 0.567442 | 0.034308 |
| XA_Hypo | GLU_VS | 0.560349 | 0.037142 |
| QA_Hypo | GLU_VS | 0.638113 | 0.014064 |
| TRP_Fro | GLU_VS | -0.55212 | 0.040641 |
| PICA_Plasma | GLU_VS | 0.62387 | 0.017111 |
| PICA_Fro | GLU_VS | -0.54758 | 0.042674 |
|  |  |  |  |
|  |  |  |  |
|  |  |  |  |

**Table S5. Significant correlations among kynurenine pathway metabolites, tryptophan, and glutamate in female *Negr1-/-* mice.** Correlation data are shown for five regions: frontal cortex (Fro), hippocampus (Hipo), hypothalamus (Hypo), ventral striatum (VS), and blood plasma (Plasma). Seven metabolites most relevant to the study were included in the analysis: KYNA – kynurenic acid, KYN – kynurenine, TRP – tryptophan, QA – quinolinic acid, PICA – picolinic acid, XA – xanthurenic acid, and GLU – glutamate.

| **Variable_1** | **Variable_2** | **Correlation** | **P_Value** |
| --- | --- | --- | --- |
| QA_Hipo | XA_Hipo | 0.579929 | 0.009174 |
| KYN_Hypo | XA_Hipo | -0.49451 | 0.02013 |
| QA_Hypo | XA_Hypo | 0.756827 | 0.005696 |
| GLU_Hypo | XA_Hypo | 0.77497 | 0.024292 |
| QA_Fro | XA_Fro | 0.856982 | 0.000512 |
| TRP_Fro | XA_Fro | 0.63519 | 0.031335 |
| KYN_Hypo | XA_Fro | 0.626909 | 0.010607 |
| GLU_Fro | XA_Fro | 0.806961 | 0.000749 |
| QA_VS | XA_VS | 0.672041 | 0.001717 |
| PICA_Plasma | XA_VS | 0.604395 | 0.037378 |
| GLU_VS | XA_VS | 0.910404 | 0.0000136 |
| KYN_Fro | KYNA_Fro | 0.501611 | 0.034509 |
| PICA_VS | KYNA_VS | 0.693428 | 0.005634 |
| GLU_VS | KYNA_VS | 0.732663 | 0.003201 |
| TRP_Fro | QA_Plasma | -0.65507 | 0.013999 |
| GLU_Fro | QA_Plasma | -0.56387 | 0.036334 |
| XA_Hipo | QA_Hipo | 0.579929 | 0.009174 |
| TRP_Fro | QA_Hipo | -0.66883 | 0.049417 |
| KYN_Hypo | QA_Hipo | -0.56593 | 0.020493 |
| GLU_Hipo | QA_Hipo | 0.795657 | 0.003979 |
| XA_Hypo | QA_Hypo | 0.756827 | 0.005696 |
| TRP_Hipo | QA_Hypo | 0.687532 | 0.020054 |
| GLU_Hypo | QA_Hypo | 0.766569 | 0.001972 |
| XA_Fro | QA_Fro | 0.856982 | 0.000512 |
| QA_VS | QA_Fro | -0.62561 | 0.027548 |
| TRP_Fro | QA_Fro | 0.57507 | 0.027681 |
| KYN_Plasma | QA_Fro | 0.532915 | 0.033257 |
| KYN_Hypo | QA_Fro | 0.820008 | 0.001337 |
| PICA_Hypo | QA_Fro | 0.53558 | 0.036978 |
| GLU_Fro | QA_Fro | 0.733996 | 0.004563 |
| XA_VS | QA_VS | 0.672041 | 0.001717 |
| QA_Fro | QA_VS | -0.62561 | 0.027548 |
| KYN_VS | QA_VS | 0.449625 | 0.024711 |
| PICA_Plasma | QA_VS | 0.690854 | 0.012858 |
| **Variable_1** | **Variable_2** | **Correlation** | **P_Value** |
| PICA_Hypo | QA_VS | -0.7071 | 0.013851 |
| GLU_Fro | QA_VS | -0.72552 | 0.024138 |
| GLU_VS | QA_VS | 0.67066 | 0.005671 |
| TRP_Hypo | TRP_Plasma | 0.583556 | 0.014665 |
| TRP_VS | TRP_Plasma | 0.410861 | 0.04227 |
| GLU_Plasma | TRP_Plasma | 0.50403 | 0.037605 |
| GLU_Hipo | TRP_Plasma | -0.66892 | 0.019567 |
| QA_Hypo | TRP_Hipo | 0.687532 | 0.020054 |
| TRP_Plasma | TRP_Hypo | 0.583556 | 0.014665 |
| TRP_VS | TRP_Hypo | 0.609352 | 0.020493 |
| GLU_Hipo | TRP_Hypo | -0.81569 | 0.001116 |
| XA_Fro | TRP_Fro | 0.63519 | 0.031335 |
| QA_Plasma | TRP_Fro | -0.65507 | 0.013999 |
| QA_Hipo | TRP_Fro | -0.66883 | 0.049417 |
| QA_Fro | TRP_Fro | 0.57507 | 0.027681 |
| GLU_Hipo | TRP_Fro | -0.71606 | 0.005788 |
| GLU_Fro | TRP_Fro | 0.653524 | 0.013788 |
| TRP_Plasma | TRP_VS | 0.410861 | 0.04227 |
| TRP_Hypo | TRP_VS | 0.609352 | 0.020493 |
| QA_Fro | KYN_Plasma | 0.532915 | 0.033257 |
| KYN_Hypo | KYN_Plasma | 0.700072 | 0.006241 |
| XA_Hipo | KYN_Hypo | -0.49451 | 0.02013 |
| XA_Fro | KYN_Hypo | 0.626909 | 0.010607 |
| QA_Hipo | KYN_Hypo | -0.56593 | 0.020493 |
| QA_Fro | KYN_Hypo | 0.820008 | 0.001337 |
| KYN_Plasma | KYN_Hypo | 0.700072 | 0.006241 |
| GLU_Fro | KYN_Hypo | 0.581728 | 0.047674 |
| KYNA_Fro | KYN_Fro | 0.501611 | 0.034509 |
| QA_VS | KYN_VS | 0.449625 | 0.024711 |
| XA_VS | PICA_Plasma | 0.604395 | 0.037378 |
| QA_VS | PICA_Plasma | 0.690854 | 0.012858 |
| GLU_Fro | PICA_Plasma | -0.64214 | 0.024359 |
| QA_Fro | PICA_Hypo | 0.53558 | 0.036978 |
| QA_VS | PICA_Hypo | -0.7071 | 0.013851 |
| KYNA_VS | PICA_VS | 0.693428 | 0.005634 |
| GLU_VS | PICA_VS | 0.755694 | 0.002685 |
| TRP_Plasma | GLU_Plasma | 0.50403 | 0.037605 |
| QA_Hipo | GLU_Hipo | 0.795657 | 0.003979 |
| TRP_Plasma | GLU_Hipo | -0.66892 | 0.019567 |
| TRP_Hypo | GLU_Hipo | -0.81569 | 0.001116 |
| TRP_Fro | GLU_Hipo | -0.71606 | 0.005788 |
| XA_Hypo | GLU_Hypo | 0.77497 | 0.024292 |
| QA_Hypo | GLU_Hypo | 0.766569 | 0.001972 |
| XA_Fro | GLU_Fro | 0.806961 | 0.000749 |
| QA_Plasma | GLU_Fro | -0.56387 | 0.036334 |
| QA_Fro | GLU_Fro | 0.733996 | 0.004563 |
| QA_VS | GLU_Fro | -0.72552 | 0.024138 |
| TRP_Fro | GLU_Fro | 0.653524 | 0.013788 |
| KYN_Hypo | GLU_Fro | 0.581728 | 0.047674 |
| PICA_Plasma | GLU_Fro | -0.64214 | 0.024359 |
| XA_VS | GLU_VS | 0.910404 | 0.0000136 |
| KYNA_VS | GLU_VS | 0.732663 | 0.003201 |
| QA_VS | GLU_VS | 0.67066 | 0.005671 |
| PICA_VS | GLU_VS | 0.755694 | 0.002685 |
|  |  |  |  |
|  |  |  |  |
|  |  |  |  |
|  |  |  |  |


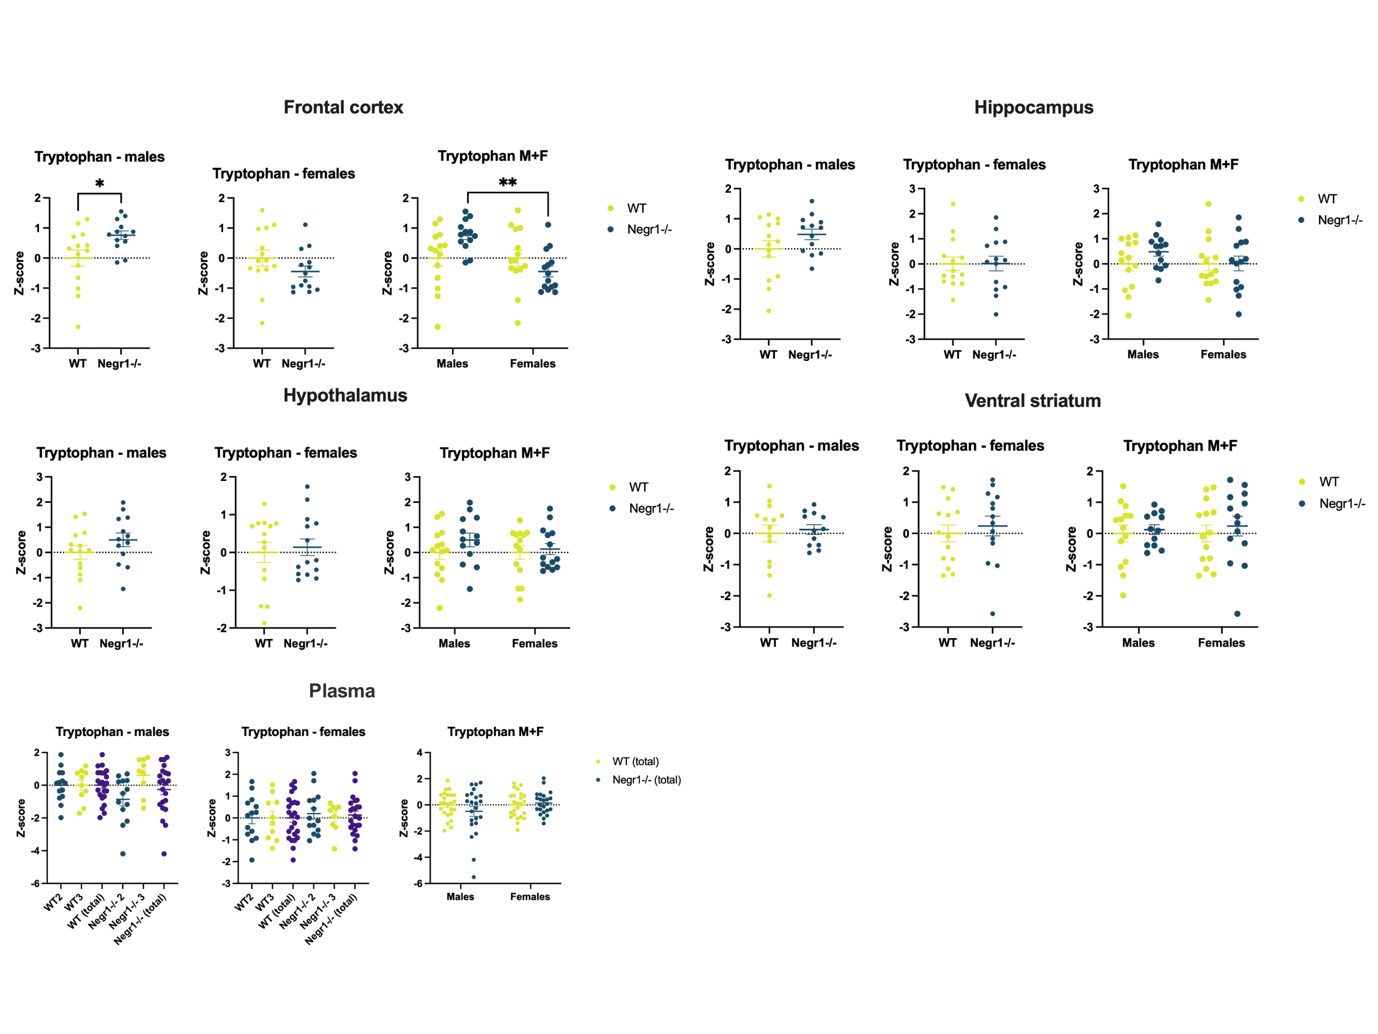


**Fig. S8. Differences in the tryptophan levels between wild-type (WT) and *Negr1*-deficient mice across four brain regions (frontal cortex, hippocampus, hypothalamus, ventral striatum) and blood plasma.** Significant differences in tryptophan levels were seen in the frontal cortex between male WT and *Negr1-/-* mice, and between male and female *Negr1-/-* mice. Notably, tryptophan levels were elevated in *Negr1-/-* males while showing a slight decrease in *Negr1-/-* females. Data are presented as mean ± SEM, n = 12 - 14. Plasma data were obtained from cohort 2 (5-month-olds) and cohort 3 (7-month-olds); brain data are from cohort 2 only. Statistical analysis: unpaired *t*-test for separate male and female genotype comparisons, one-way ANOVA for plasma, and ordinary two-way ANOVA with Tukey’s HSD test for combined-sex analysis. * – *p* < 0.05, ** – *p* < 0.001.


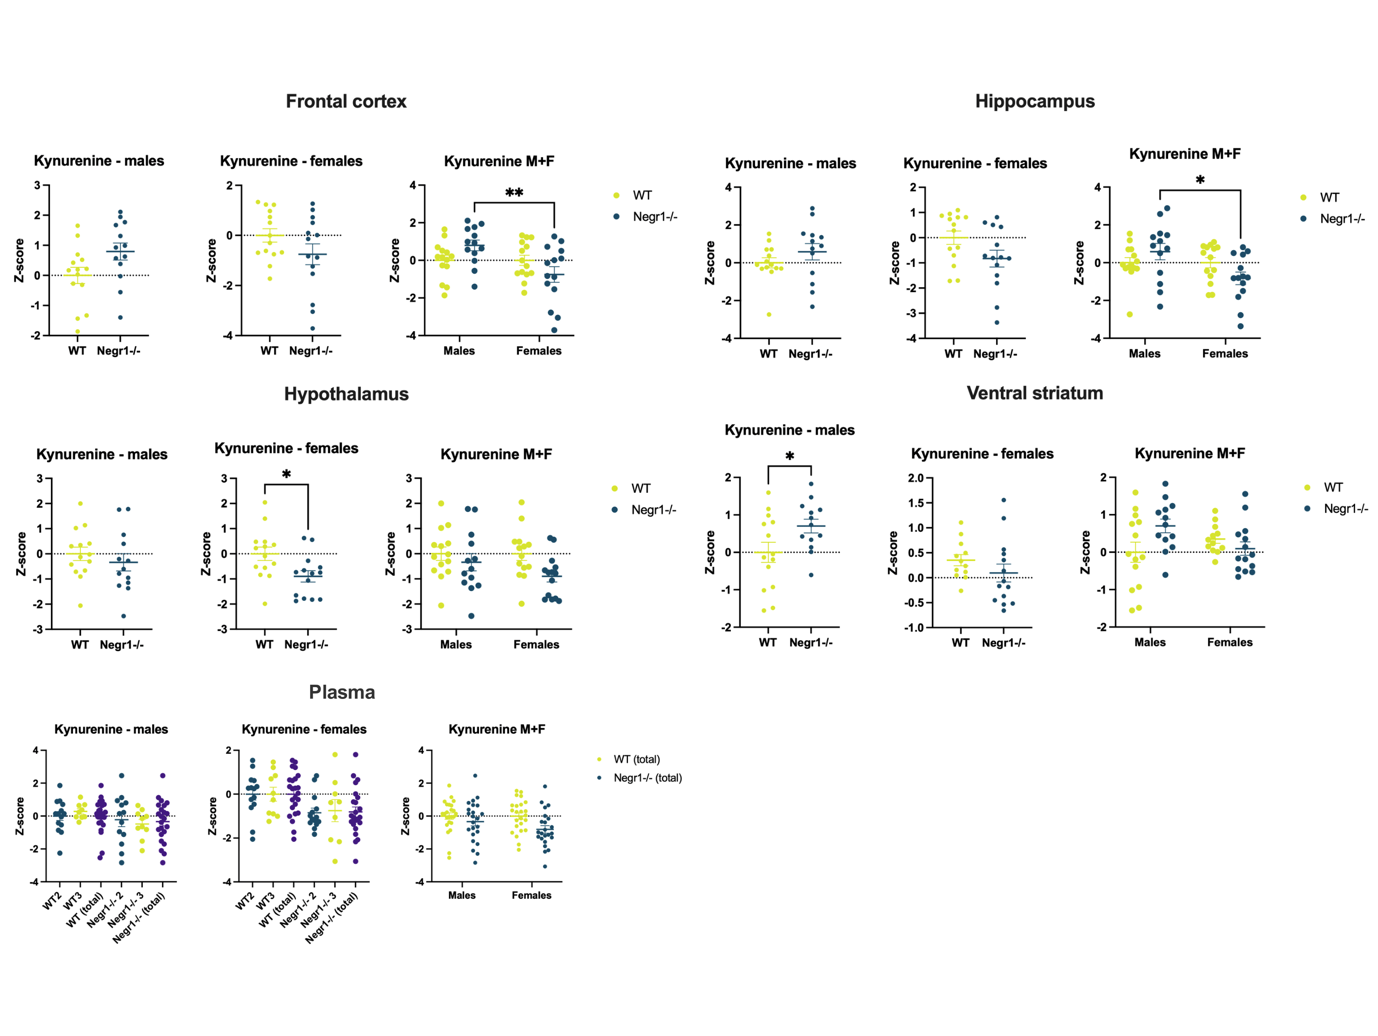


**Fig. S9. Differences in the kynurenine levels between wild-type (WT) and *Negr1*-deficient mice across four brain regions (frontal cortex, hippocampus, hypothalamus, ventral striatum) and blood plasma.** Most notable differences were between male and female *Negr1*-deficient mice in the frontal cortex and hippocampus, where kynurenine levels were increased in males and decreased in females. Although the difference was not statistically significant compared to WT mice, it was significant between genders. In the hypothalamus, there was a significant decrease in the kynurenine levels of female *Negr1-/-* mice and in the ventral striatum, there was a significant increase in male *Negr1-/-* mice. Data represents mean ± SEM, n = 12 - 14. Plasma data is from cohort 2 (5-month-olds) and cohort 3 (7-month-olds); brain data is only from cohort 2. Unpaired t-test was used for the separate male and female genotype analysis (one-way ANOVA for plasma) and ordinary two-way ANOVA (Tukey HSD test) when both sexes were together. * - p-value < 0.05, ** - p-value < 0.001.


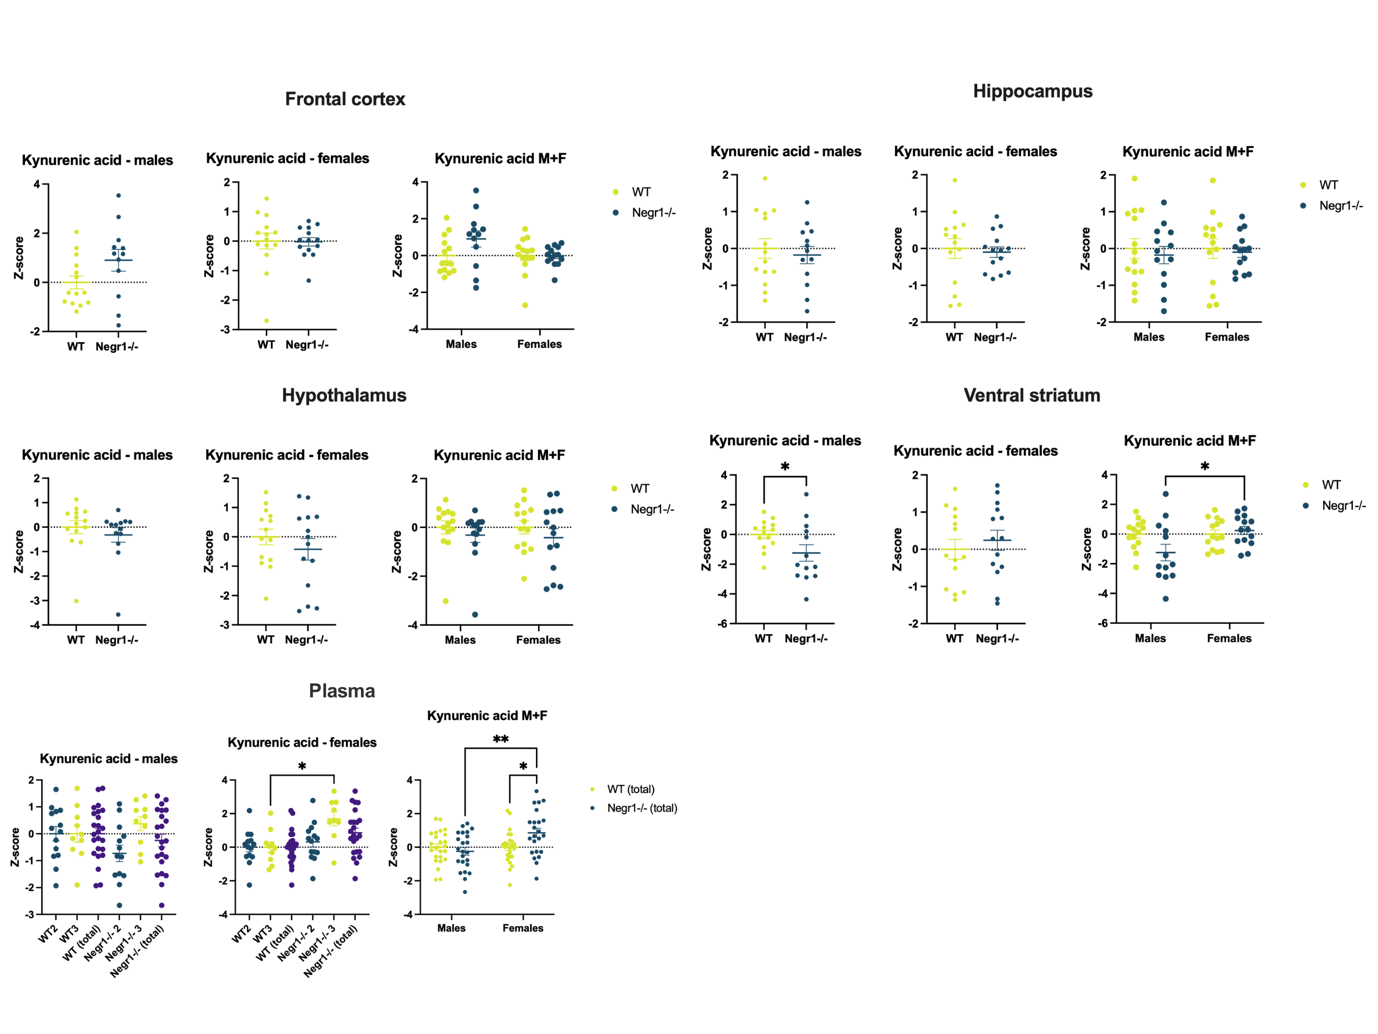


**Fig. S10. Differences in the kynurenic acid levels between wild-type (WT) and *Negr1*-deficient mice across four brain regions (frontal cortex, hippocampus, hypothalamus, ventral striatum) and blood plasma.** In the ventral striatum, the kynurenic acid levels were significantly decreased in male *Negr1-/-* mice, while no difference was observed between WT and mutant female mice. In contrast, plasma kynurenic acid levels were significantly increased in female *Negr1-/-* mice, with no corresponding difference between WT and *Negr1-/-* males. Data represents mean ± SEM, n = 12 - 14. Plasma data is from cohort 2 (5-month-olds) and cohort 3 (7-month-olds); brain data is only from cohort 2. Unpaired t-test was used for the separate male and female genotype analysis (one-way ANOVA for plasma) and ordinary two-way ANOVA (Tukey HSD test) when both sexes were together. * - p-value < 0.05, ** - p-value < 0.001.


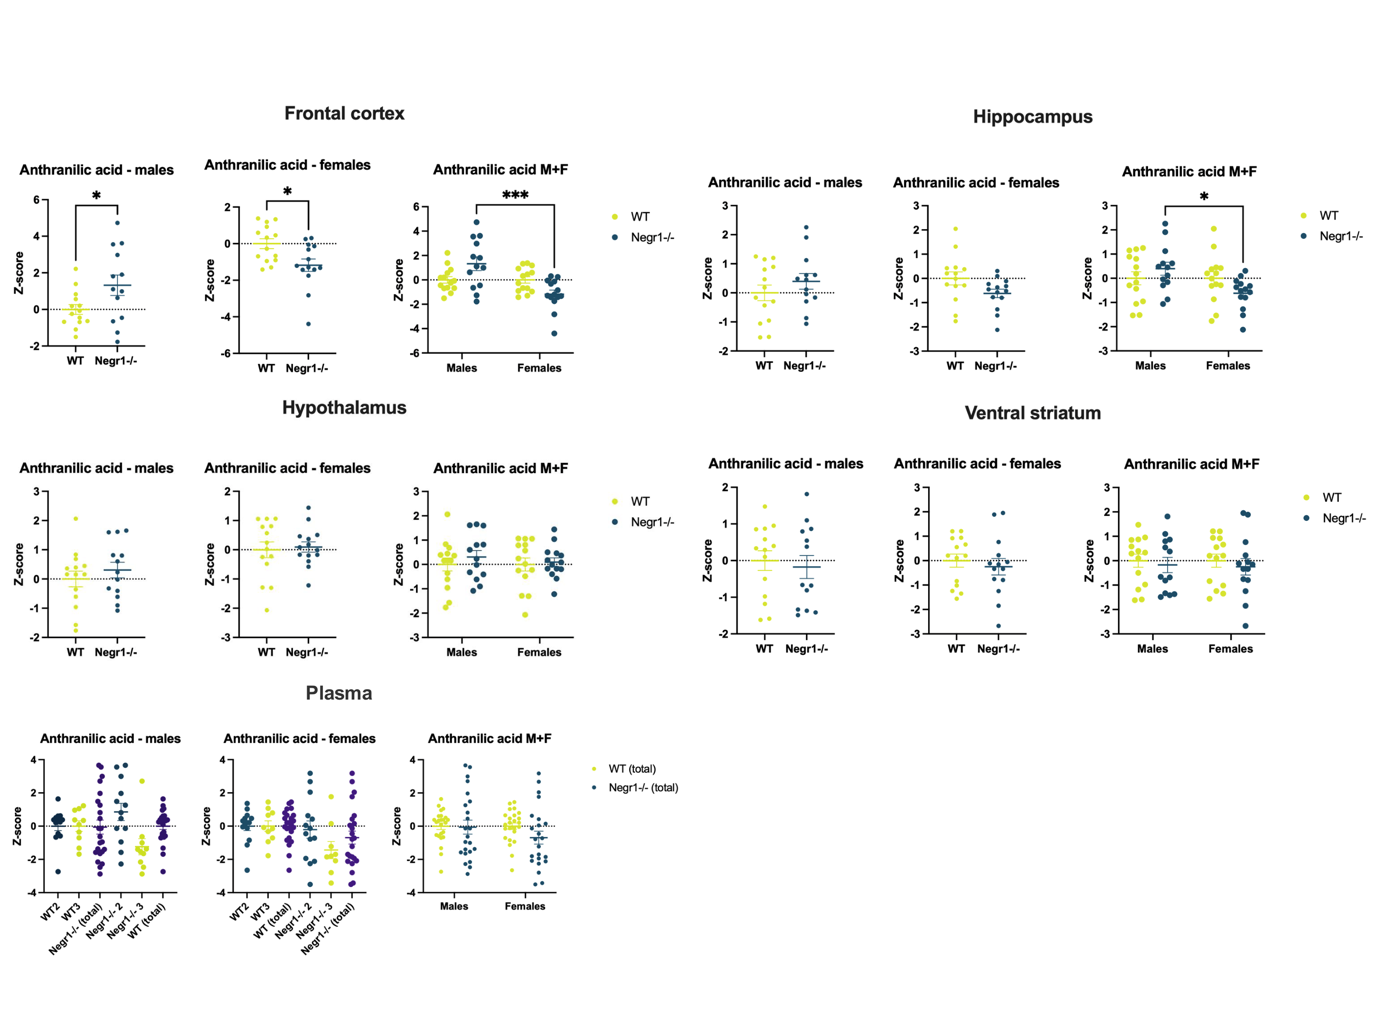


**Fig. S11. Differences in the anthranilic acid levels between wild-type (WT) and *Negr1*-deficient mice across four brain regions (frontal cortex, hippocampus, hypothalamus, ventral striatum) and blood plasma.** In the frontal cortex, the anthranilic acid levels had significantly increased in male and decreased in female *Negr1*-deficient mice. The same trend could be seen in the hippocampus. Data represents mean ± SEM, n = 12 - 14. Plasma data is from cohort 2 (5-month-olds) and cohort 3 (7-month-olds); brain data is only from cohort 2. Unpaired t-test was used for the separate male and female genotype analysis (one-way ANOVA for plasma) and ordinary two-way ANOVA (Tukey HSD test) when both sexes were together. * - p-value < 0.05, *** - p-value < 0.0001.


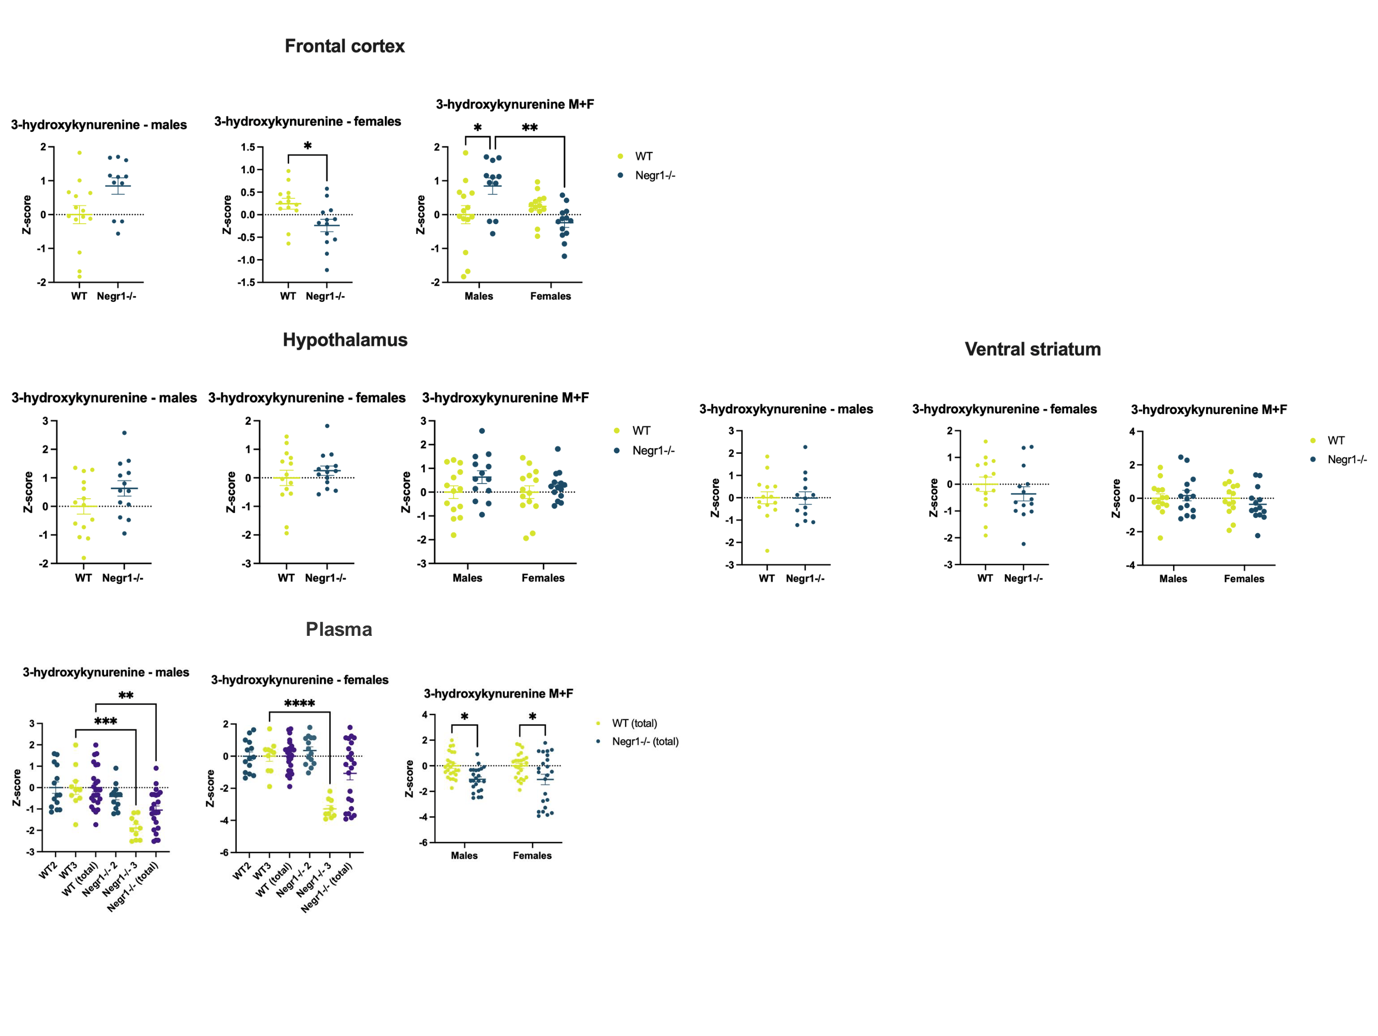


**Fig. S12. Differences in the 3-hydroxykynurenine levels between wild-type (WT) and *Negr1*-deficient mice across three brain regions (frontal cortex, hypothalamus, ventral striatum) and blood plasma.** 3-hydroxykynurenine displayed interesting results in the frontal cortex - metabolite levels were increased in male *Negr1-/-* mice but decreased in female *Negr1-/-* mice compared to the WT mice. In the blood plasma, 3-hydroxykynurenine levels were significantly diminished in both male and female *Negr1-/-* mice from cohort 3. In the hippocampus, the results were not up to standard and were excluded. Data represents mean ± SEM, n = 12 - 14. Plasma data is from cohort 2 (5-month-olds) and cohort 3 (7-month-olds); brain data is only from cohort 2. Unpaired t-test was used for the separate male and female genotype analysis (one-way ANOVA for plasma) and ordinary two-way ANOVA (Tukey HSD test) when both sexes were together. * - p-value < 0.05, ** - p-value < 0.001, *** - p-value < 0.0001, **** - p-value < 0.00001.


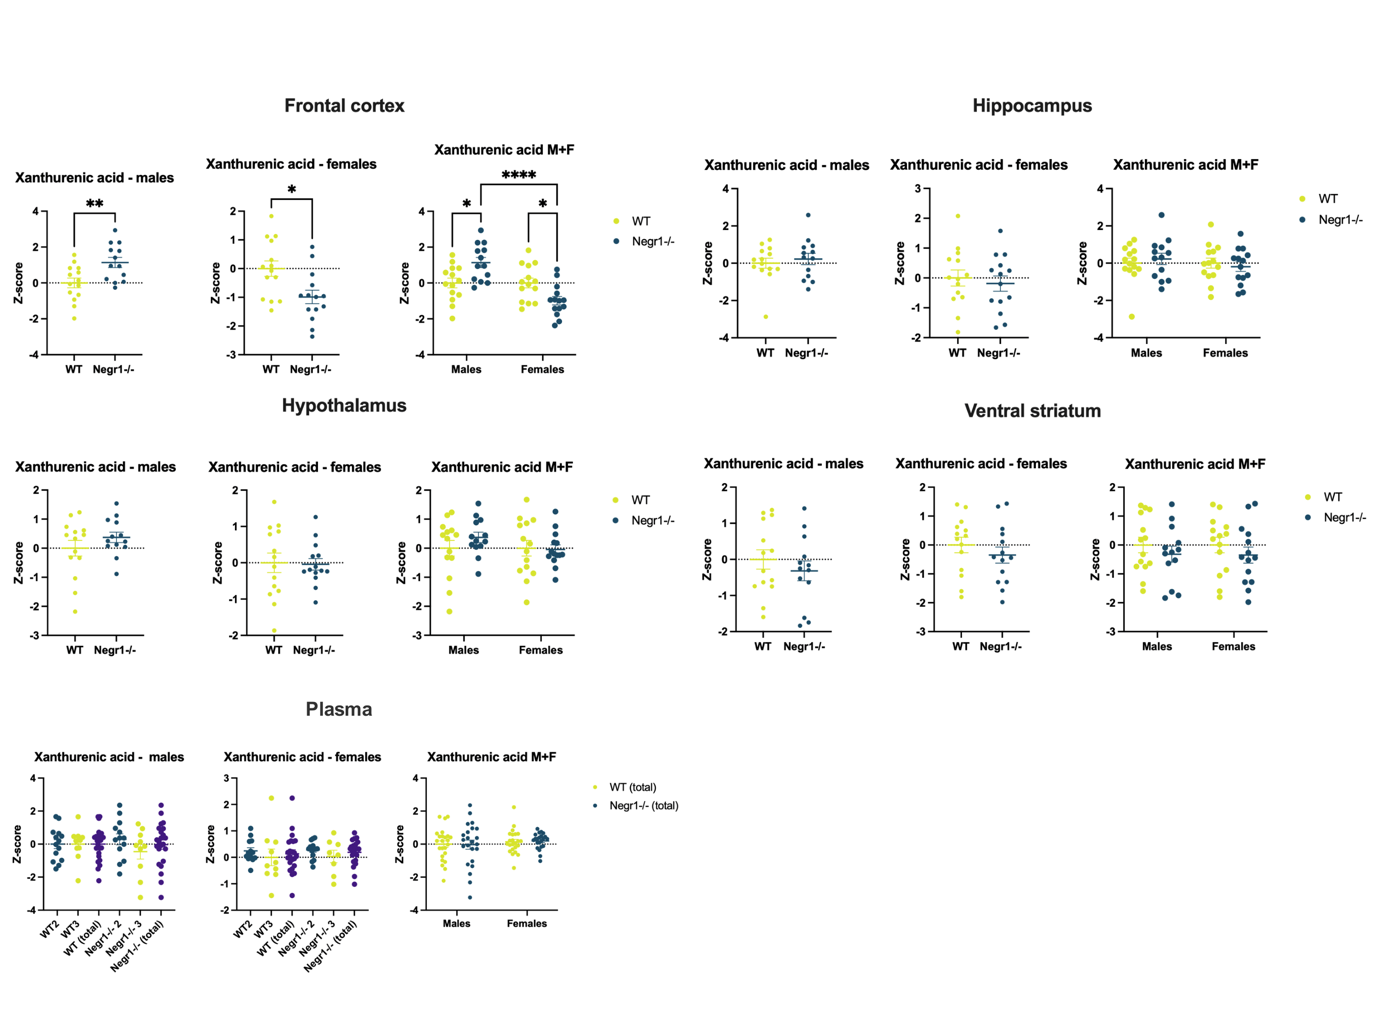


**Fig. S13. Differences in the xanthurenic acid levels between wild-type (WT) and *Negr1*-deficient mice across four brain regions (frontal cortex, hippocampus, hypothalamus, ventral striatum) and blood plasma.** Like with most other kynurenine pathway metabolites, xanthurenic acid levels were increased in male *Negr1-/-* mice, while the opposite was true for female mice in the frontal cortex. Data represents mean ± SEM, n = 12 - 14. Plasma data is from cohort 2 (5-month-olds) and cohort 3 (7-month-olds); brain data is only from cohort 2. Unpaired t-test was used for the separate male and female genotype analysis (one-way ANOVA for plasma) and ordinary two-way ANOVA (Tukey HSD test) when both sexes were together. * - p-value < 0.05, ** - p-value < 0.001. **** - p-value < 0.00001.


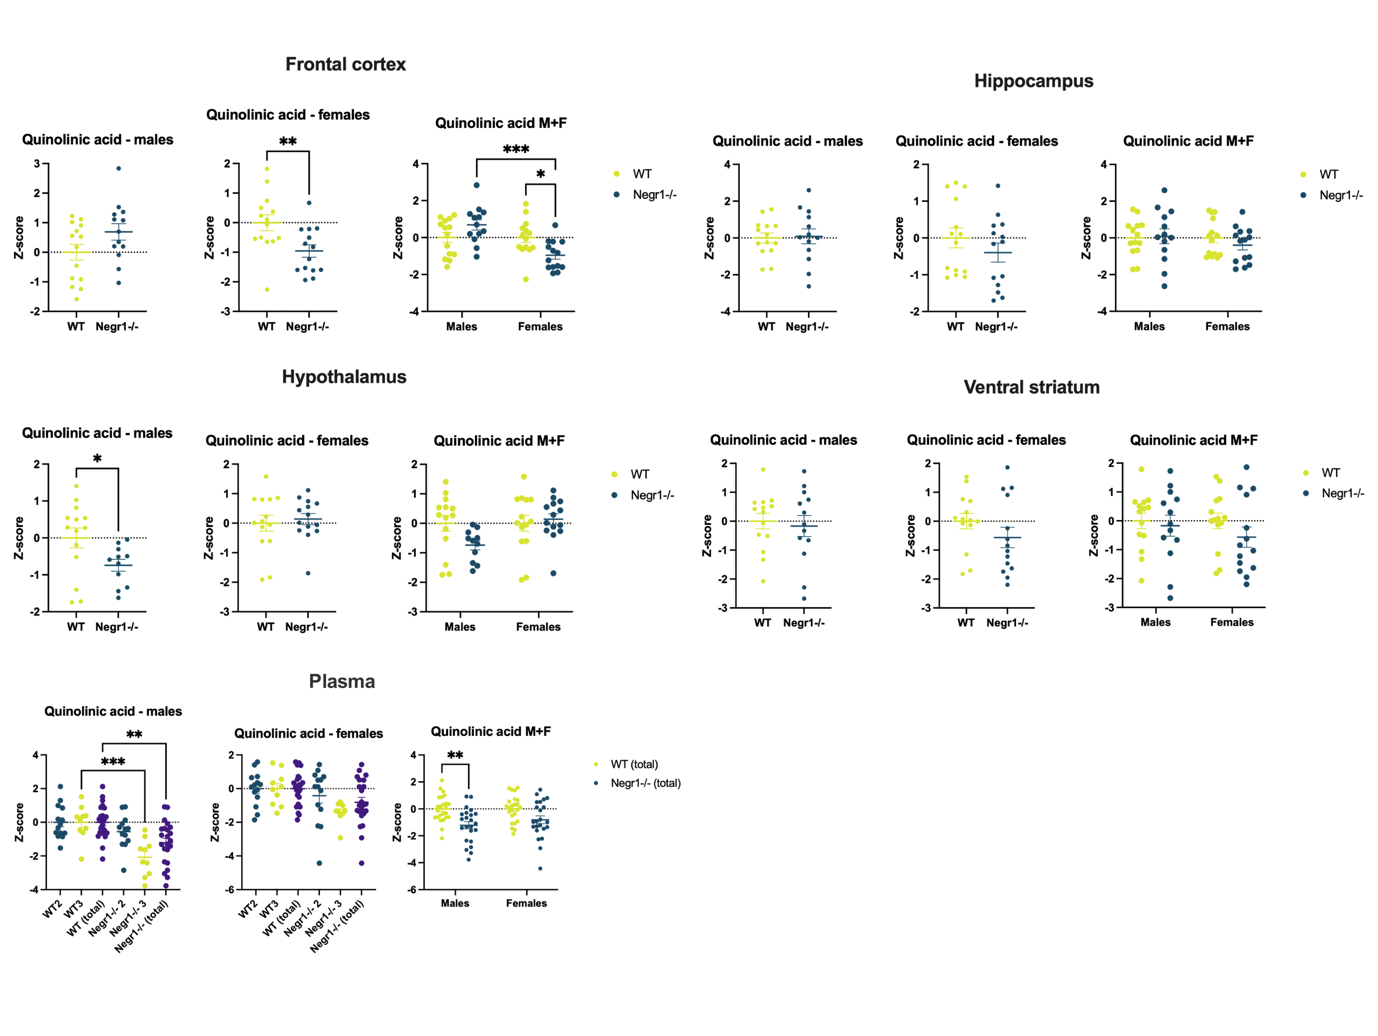


**Fig. S14. Differences in the quinolinic acid levels between wild-type (WT) and *Negr1*-deficient mice across four brain regions (frontal cortex, hippocampus, hypothalamus, ventral striatum) and blood plasma.** In the frontal cortex, the quinolinic acid levels were significantly decreased in female *Negr1-/-* mice but slightly increased in males. However, in the hypothalamus and blood plasma, quinolinic acid levels were strongly decreased in male *Negr1-/-* mice, while there was no change in the female metabolite levels. Data represents mean ± SEM, n = 12 - 14. Plasma data is from cohort 2 (5-month-olds) and cohort 3 (7-month-olds); brain data is only from cohort 2. Unpaired t-test was used for the separate male and female genotype analysis (one-way ANOVA for plasma) and ordinary two-way ANOVA (Tukey HSD test) when both sexes were together. * - p-value < 0.05, ** - p-value < 0.001. *** - p-value < 0.0001.


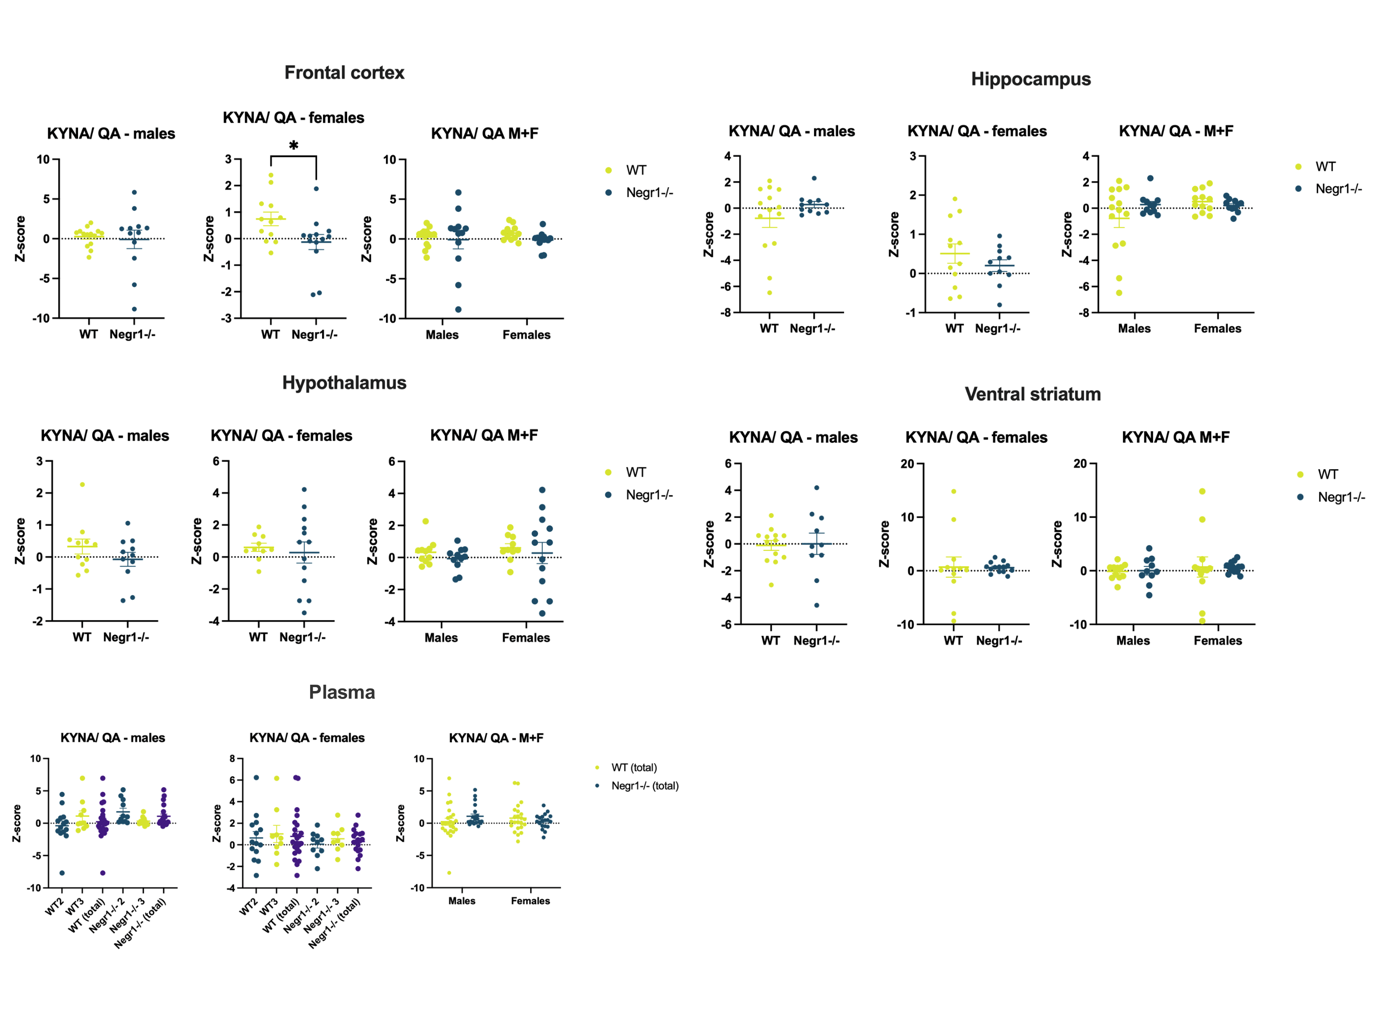


**Fig. S15. Differences in the kynurenic acid/ quinolinic acid ratio between wild-type (WT) and *Negr1*-deficient mice across four brain regions (frontal cortex, hippocampus, hypothalamus, ventral striatum) and blood plasma.** The only significant difference in the kynurenic acid/ quinolinic acid ratio was in the frontal cortex of female mice - there was a significant decrease in the ratio of *Negr1-/-* mice compared to WT mice. Data represents mean ± SEM, n = 12 - 14. Plasma data is from cohort 2 (5-month-olds) and cohort 3 (7-month-olds); brain data is only from cohort 2. Unpaired t-test was used for the separate male and female genotype analysis (one-way ANOVA for plasma) and ordinary two-way ANOVA (Tukey HSD test) when both sexes were together. * - p-value < 0.05.


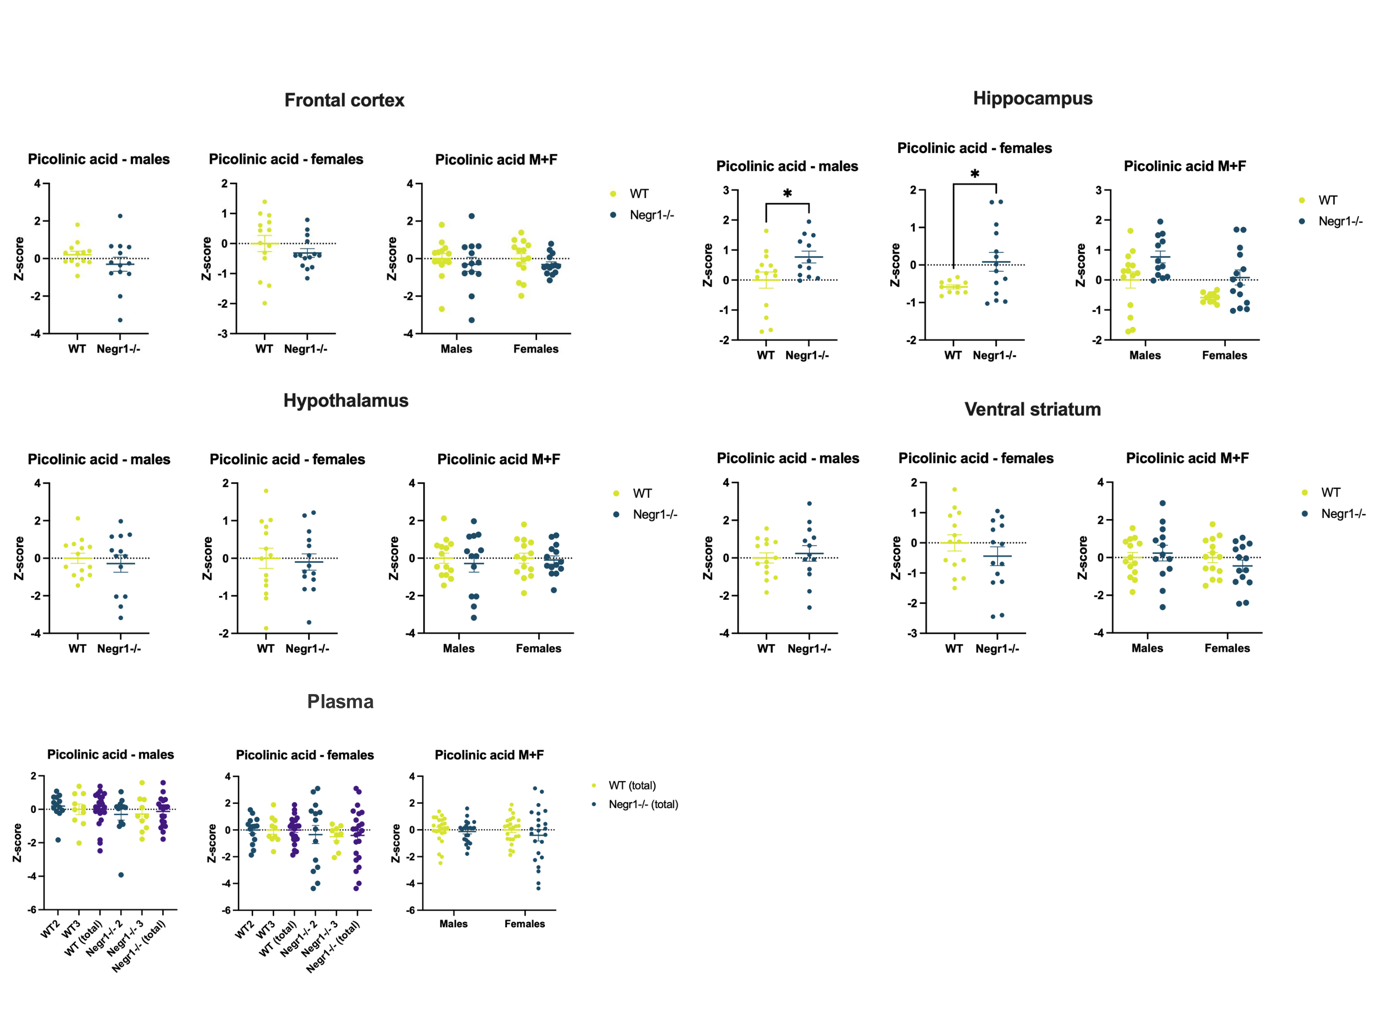


**Fig. S16. Differences in the picolinic acid levels between wild-type (WT) and *Negr1*-deficient mice across four brain regions (frontal cortex, hippocampus, hypothalamus, ventral striatum) and blood plasma.** Picolinic acid levels were increased in both male and female *Negr1-/-* mice in the hippocampus compared to their WT counterparts. Data represents mean ± SEM, n = 12 - 14. Plasma data is from cohort 2 (5-month-olds) and cohort 3 (7-month-olds); brain data is only from cohort 2. Unpaired t-test was used for the separate male and female genotype analysis (one-way ANOVA for plasma) and ordinary two-way ANOVA (Tukey HSD test) when both sexes were together. * - p-value < 0.05.


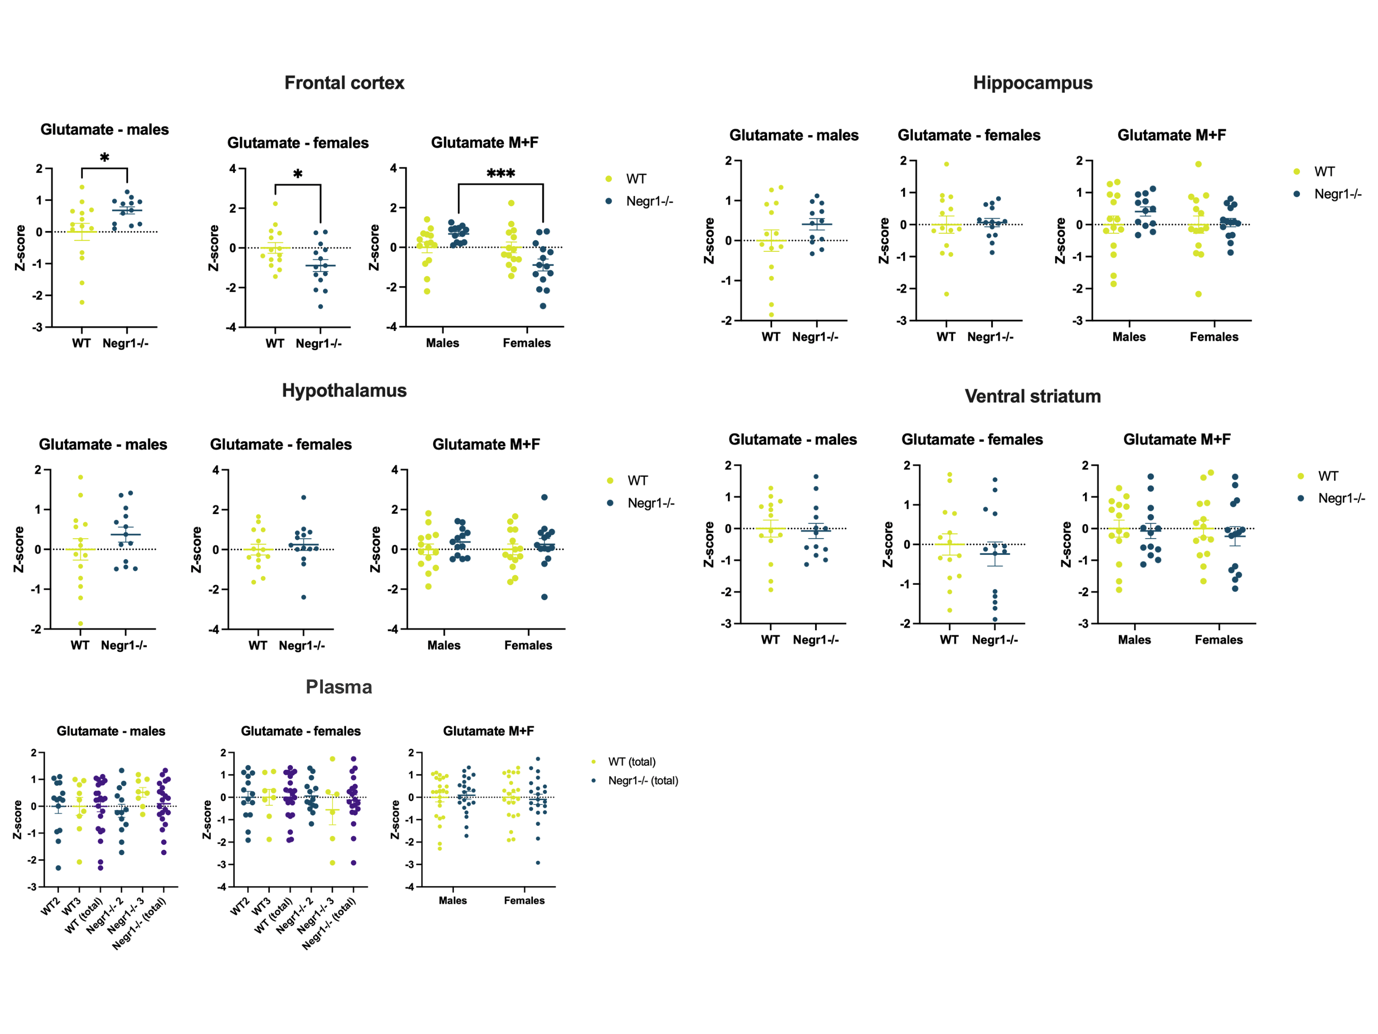


**Fig. S17. Differences in the glutamate levels between wild-type (WT) and *Negr1*-deficient mice across four brain regions (frontal cortex, hippocampus, hypothalamus, ventral striatum) and blood plasma.** Similarly to most kynurenine pathway metabolites, glutamate levels were significantly increased in male *Negr1-/-* mice and decreased in females in the frontal cortex.Data represents mean ± SEM, n = 12 - 14. Plasma data is from cohort 2 (5-month-olds) and cohort 3 (7-month-olds); brain data is only from cohort 2. Unpaired t-test was used for the separate male and female genotype analysis (one-way ANOVA for plasma) and ordinary two-way ANOVA (Tukey HSD test) when both sexes were together. * - p-value < 0.05, *** - p-value < 0.0001.

**Table S6. Primer sequences.**

| Hprt_mm_F | GCAGTACAGCCCCAAAATGG |
| --- | --- |
| Hprt_mm_R | AACAAAGTCTGGCCTGTATCCAA |
| Grin1_mm_F | GTTCTTCCGCTCCGGCTTTG |
| Grin1_mm_R | CGAACCCATGTCTTATCCAGGTC |
| Grin2a_mm_F | TGCAAGTTACACAGCCAACCTG |
| Grin2a_mm_R | ATCGGAAAGGCGGAGAATAGTC |
| Grin2b_mm_F | TCATTTCTGCTCAGACTCTCACC |
| Grin2b_mm_R | TCAATGGATGGGCCAAACTGG |
| Srr_mm_F | AGAAGCCCAAAGCCGTAGTTAC |
| Srr_mm_R | TGCAGTTGGGAGCTGTTTGG |
